# Supplementary material
Source: publisher site journal article supplement (https://www.spandidos-publications.com/8663/downloadSupplementary)
Supplement: Supplementary file 1 [file downloadSupplementary]

## Sheet: Supplementary Table 1
Table SI. Proteins and the modified sites in different clusters.
Protein accession	Position	Amino acid	Protein description	Gene name	Localization probability	PEP	Score	Charge	Modified sequence	Mass error [ppm]	MS/MS Count	control	min_10	min_15	min_30	min_5	min_60	min_60/min_10 Ratio	min_15/control Ratio	min_60/min_5 Ratio	min_5/control Ratio	min_15/min_5 Ratio	min_60/control Ratio	min_30/min_10 Ratio	min_15/min_10 Ratio	min_60/min_30 Ratio	min_30/min_15 Ratio	min_60/min_15 Ratio	min_30/min_5 Ratio	min_10/control Ratio	min_30/control Ratio	min_10/min_5 Ratio	Cluster	Membership
Q8K0F1	684	S	TBC1 domain family member 23 OS=Mus musculus OX=10090 GN=Tbc1d23 PE=1 SV=1	Tbc1d23	1	0.00580651	98.997	2	VLDALES(1)	-0.48364	1	1.039	1.129	1.032	0.764	0.673	1.362	1.206	0.993	2.024	0.648	1.533	1.311	0.677	0.914	1.783	0.74	1.32	1.135	1.087	0.735	1.678	Cluster1	0.305573349247355
Q8K1M6	535	S	Dynamin-1-like protein OS=Mus musculus OX=10090 GN=Dnm1l PE=1 SV=2	Dnm1l	0.914017	0.00982963	62.14	3	ELPS(0.086)AGS(0.914)RDK	0.31351	1	1.246	0.874	0.614	1.036	0.766	1.464	1.675	0.493	1.911	0.615	0.802	1.175	1.185	0.703	1.413	1.687	2.384	1.352	0.701	0.831	1.141	Cluster1	0.325043499865425
Q8K2T8	418	S	RNA polymerase II-associated factor 1 homolog OS=Mus musculus OX=10090 GN=Paf1 PE=1 SV=1	Paf1	0.991183	6.88866e-06	147.27	4	EGSEDEHS(0.001)GS(0.007)ES(0.991)DREEGDRDEASDK	0.23549	3	1.139	1.345	0.926	0.836	0.74	1.014	0.754	0.813	1.37	0.65	1.251	0.89	0.622	0.688	1.213	0.903	1.095	1.13	1.181	0.734	1.818	Cluster1	0.27218418694737
Q8K4E0	2794	S	Alstrom syndrome protein 1 homolog OS=Mus musculus OX=10090 GN=Alms1 PE=1 SV=2	Alms1	1	0.0084468	64.439	3	VFS(1)PHQGGK	0.80622	1	1.393	1.185	0.814	1	0.738	0.87	0.734	0.584	1.179	0.53	1.103	0.625	0.844	0.687	0.87	1.229	1.069	1.355	0.851	0.718	1.606	Cluster1	0.287844186318796
Q8N7N5	124	S	DDB1- and CUL4-associated factor 8 OS=Mus musculus OX=10090 GN=Dcaf8 PE=1 SV=1	Dcaf8	1	3.1712e-05	126.48	2	DQDS(1)S(1)DDER	0.064889	4	1.081	1.157	0.778	0.896	0.684	1.404	1.213	0.72	2.053	0.633	1.137	1.299	0.774	0.672	1.567	1.152	1.805	1.31	1.07	0.829	1.692	Cluster1	0.343635523268195
O08784	1242	S	Treacle protein OS=Mus musculus OX=10090 GN=Tcof1 PE=1 SV=1	Tcof1	1	0.000474051	97.273	3	GKGS(1)PGPQGAK	0.10597	1	1.509	0.786	0.912	0.727	0.815	1.252	1.593	0.604	1.536	0.54	1.119	0.83	0.925	1.16	1.722	0.797	1.373	0.892	0.521	0.482	0.964	Cluster1	0.373918996777809
Q8R0F5	227	S	RNA-binding motif protein, X-linked 2 OS=Mus musculus OX=10090 GN=Rbmx2 PE=1 SV=1	Rbmx2	0.996959	0.001569	83.045	3	SHS(0.003)GS(0.997)PDGR	0.43646	2	1.082	1.121	1.088	0.789	0.649	1.27	1.133	1.006	1.957	0.6	1.676	1.174	0.704	0.971	1.61	0.725	1.167	1.216	1.036	0.729	1.727	Cluster1	0.309482433009775
Q8R1Q8	405	S	Cytoplasmic dynein 1 light intermediate chain 1 OS=Mus musculus OX=10090 GN=Dync1li1 PE=1 SV=1	Dync1li1	1	0.0314771	60.589	2	VPGGS(1)PR	0.46013	1	1.44	0.837	0.743	1.026	0.839	1.115	1.332	0.516	1.329	0.583	0.886	0.774	1.226	0.888	1.087	1.381	1.501	1.223	0.581	0.712	0.998	Cluster1	0.333640540321964
Q924A2	2311	S	Protein capicua homolog OS=Mus musculus OX=10090 GN=Cic PE=1 SV=2	Cic	0.991061	2.65427e-32	254.02	2	NSTDLDSAPEDPT(0.009)S(0.991)PK	2.0981	9	1.255	0.716	0.817	1.002	0.99	1.22	1.704	0.651	1.232	0.789	0.825	0.972	1.399	1.141	1.218	1.226	1.493	1.012	0.571	0.798	0.723	Cluster1	0.275321566126073
Q99MN1	588	S	Lysine--tRNA ligase OS=Mus musculus OX=10090 GN=Kars1 PE=1 SV=1	Kars1	0.995844	1.49766e-43	279.44	2	ETAATTETPES(0.996)T(0.004)EAS(1)PSV	-0.037271	8	1.317	1.153	1.026	0.72	0.822	0.963	0.835	0.779	1.172	0.624	1.248	0.731	0.624	0.89	1.338	0.702	0.939	0.876	0.875	0.547	1.403	Cluster1	0.259693964483641
Q99PL5	786	S	Ribosome-binding protein 1 OS=Mus musculus OX=10090 GN=Rrbp1 PE=1 SV=2	Rrbp1	0.998568	0.00015854	113.99	3	KDGS(0.999)PS(0.001)QAK	0.21053	1	1.171	0.976	0.866	0.877	0.752	1.358	1.391	0.74	1.806	0.642	1.152	1.16	0.899	0.887	1.548	1.013	1.568	1.166	0.833	0.749	1.298	Cluster1	0.409559075782034
Q9CR57	139	S	60S ribosomal protein L14 OS=Mus musculus OX=10090 GN=Rpl14 PE=1 SV=3	Rpl14	1	0.048951	43.502	3	AAILKAS(1)PK	-0.28848	1	1.469	0.846	1.116	0.892	0.798	0.879	1.039	0.76	1.102	0.543	1.398	0.598	1.054	1.319	0.985	0.799	0.788	1.118	0.576	0.607	1.06	Cluster1	0.274689578098706
Q9D281	362	S	Protein Noxp20 OS=Mus musculus OX=10090 GN=Fam114a1 PE=1 SV=1	Fam114a1	1	4.75161e-07	179.86	3	ESENEANPEEQGLEES(1)GEEFAR	-0.32845	1	1.195	0.689	1.08	1.13	0.763	1.144	1.66	0.904	1.499	0.638	1.415	0.957	1.64	1.567	1.012	1.046	1.059	1.481	0.577	0.946	0.903	Cluster1	0.263149869414566
O35625	485	S	Axin-1 OS=Mus musculus OX=10090 GN=Axin1 PE=1 SV=3	Axin1	0.999998	0.000133091	104.17	3	TPGCQS(1)PGPGHR	0.64669	2	0.962	1.418	1.008	0.855	0.718	1.039	0.733	1.048	1.447	0.746	1.404	1.08	0.603	0.711	1.215	0.848	1.031	1.191	1.474	0.889	1.975	Cluster1	0.214526616698321
Q9R0L6	1301	S	Pericentriolar material 1 protein OS=Mus musculus OX=10090 GN=Pcm1 PE=1 SV=2	Pcm1	0.990784	0.00710238	75.378	3	RNS(0.991)T(0.009)QLK	1.8545	1	1.305	0.971	0.913	0.754	0.854	1.202	1.238	0.7	1.407	0.654	1.069	0.921	0.777	0.94	1.594	0.826	1.317	0.883	0.744	0.578	1.137	Cluster1	0.386217249749501
Q9R1C7	830	S	Pre-mRNA-processing factor 40 homolog A OS=Mus musculus OX=10090 GN=Prpf40a PE=1 SV=1	Prpf40a	0.986896	6.16357e-11	193.47	3	SGS(0.013)ES(0.987)DDDDSHSK	1.5459	3	1.345	1.117	0.83	0.765	0.704	1.24	1.11	0.617	1.761	0.523	1.179	0.922	0.685	0.743	1.621	0.922	1.494	1.087	0.83	0.569	1.587	Cluster1	0.413058407083543
Q9Z0U1	267	S	Tight junction protein ZO-2 OS=Mus musculus OX=10090 GN=Tjp2 PE=1 SV=2	Tjp2	0.990067	0.00344042	72.184	3	EHLRS(0.99)RS(0.991)PS(0.99)PES(0.029)R	-0.060595	6	1.212	1.236	0.745	1.136	0.764	0.907	0.734	0.615	1.187	0.63	0.975	0.748	0.919	0.603	0.798	1.525	1.217	1.487	1.02	0.937	1.618	Cluster1	0.265939058231495
P57776	129	T	Elongation factor 1-delta OS=Mus musculus OX=10090 GN=Eef1d PE=1 SV=3	Eef1d	0.979118	0.00257201	74.789	4	ATAPQT(0.979)QHVS(0.021)PMR	0.38223	2	1.282	0.713	1.073	0.81	0.703	1.418	1.989	0.837	2.017	0.548	1.526	1.106	1.136	1.505	1.751	0.755	1.322	1.152	0.556	0.632	1.014	Cluster1	0.321703166818925
Q62433	366	T	Protein NDRG1 OS=Mus musculus OX=10090 GN=Ndrg1 PE=1 SV=1	Ndrg1	0.981698	0.0130615	81.338	2	S(0.003)HT(0.982)S(0.015)EDAR	1.3411	2	1.163	1.218	0.789	0.715	0.745	1.37	1.125	0.678	1.839	0.641	1.059	1.178	0.587	0.648	1.916	0.906	1.736	0.96	1.047	0.615	1.635	Cluster1	0.346576473588699
P09103	77	S	Protein disulfide-isomerase OS=Mus musculus OX=10090 GN=P4hb PE=1 SV=2	P4hb	1	0.0213217	69.825	2	AEGS(1)EIR	0.46195	1	1.262	0.901	1.024	0.908	0.679	1.226	1.361	0.811	1.806	0.538	1.508	0.971	1.008	1.137	1.35	0.887	1.197	1.337	0.714	0.719	1.327	Cluster1	0.380466444736884
P09528	5	S	Ferritin heavy chain OS=Mus musculus OX=10090 GN=Fth1 PE=1 SV=2	Fth1	0.991961	1.51958e-06	103.26	2	TTAS(0.992)PS(0.008)QVR	0.44993	5	1.247	0.853	1.145	0.91	0.694	1.151	1.349	0.918	1.659	0.557	1.65	0.923	1.067	1.342	1.265	0.795	1.005	1.311	0.684	0.73	1.229	Cluster1	0.324757278336463
P33611	141	S	DNA polymerase alpha subunit B OS=Mus musculus OX=10090 GN=Pola2 PE=1 SV=2	Pola2	0.995761	0.0405574	47.082	3	S(0.004)VAARS(0.996)PR	0.73796	1	1.577	0.813	1.003	0.937	0.574	1.096	1.348	0.636	1.909	0.364	1.747	0.695	1.153	1.234	1.17	0.934	1.093	1.632	0.516	0.594	1.416	Cluster1	0.360619454912708
A2AR02	628	S	Peptidyl-prolyl cis-trans isomerase G OS=Mus musculus OX=10090 GN=Ppig PE=1 SV=1	Ppig	0.851385	0.0324111	51.211	3	S(0.851)S(0.149)EREESQSR	0.065627	1	1.383	1.01	0.819	0.695	0.671	1.423	1.409	0.592	2.121	0.485	1.221	1.029	0.688	0.811	2.047	0.849	1.737	1.036	0.73	0.503	1.505	Cluster1	0.441241628935035
P49717	119	S	DNA replication licensing factor MCM4 OS=Mus musculus OX=10090 GN=Mcm4 PE=1 SV=1	Mcm4	1	0.00351132	78.324	3	QRPDLGS(1)AR	0.43155	1	1.176	0.941	0.89	0.702	0.932	1.359	1.444	0.757	1.458	0.793	0.955	1.156	0.746	0.946	1.936	0.789	1.527	0.753	0.8	0.597	1.01	Cluster1	0.303837940843242
P62751	43	S	60S ribosomal protein L23a OS=Mus musculus OX=10090 GN=Rpl23a PE=1 SV=1	Rpl23a	0.975328	0.00234176	89.317	3	IRT(0.025)S(0.975)PTFR	-0.13555	1	1.642	0.64	1.142	0.759	0.598	1.219	1.905	0.695	2.038	0.364	1.91	0.742	1.186	1.784	1.606	0.665	1.067	1.269	0.39	0.462	1.07	Cluster1	0.336742663956529
Q0VBL3	701	S	RNA-binding protein 15 OS=Mus musculus OX=10090 GN=Rbm15 PE=1 SV=1	Rbm15	0.98184	0.0285422	76.679	2	S(0.018)S(0.982)PVRDR	1.2446	1	1.481	1.012	0.825	0.863	0.766	1.054	1.042	0.557	1.376	0.517	1.077	0.712	0.853	0.815	1.221	1.046	1.278	1.127	0.683	0.583	1.321	Cluster1	0.368667386828272
Q4FK66	281	S	Pre-mRNA-splicing factor 38A OS=Mus musculus OX=10090 GN=Prpf38a PE=1 SV=1	Prpf38a	0.982906	0.00222845	82.417	4	S(0.017)KS(0.983)PGHHR	-1.9574	1	1.299	1.031	0.695	0.885	0.674	1.415	1.372	0.535	2.099	0.519	1.031	1.089	0.858	0.674	1.599	1.273	2.036	1.313	0.794	0.681	1.53	Cluster1	0.395892601766168
Q52KI8	260	S	Serine/arginine repetitive matrix protein 1 OS=Mus musculus OX=10090 GN=Srrm1 PE=1 SV=2	Srrm1	1	8.07312e-06	127.8	4	APKPEPVPEPKEPS(1)PEK	0.48856	1	1.432	0.873	1.083	0.921	0.777	0.913	1.046	0.756	1.175	0.543	1.394	0.638	1.055	1.241	0.991	0.85	0.843	1.185	0.61	0.643	1.124	Cluster1	0.295287317074448
A2A6A1	806	S	G patch domain-containing protein 8 OS=Mus musculus OX=10090 GN=Gpatch8 PE=1 SV=1	Gpatch8	0.993073	3.48072e-08	171.3	3	S(0.993)QPS(0.007)SGDEDS(1)DDASSHR	-0.60574	2	1.258	1.144	0.935	0.876	0.618	1.169	1.022	0.743	1.892	0.491	1.513	0.929	0.766	0.817	1.334	0.937	1.25	1.417	0.909	0.696	1.851	Cluster1	0.371435784364811
Q61083	37	S	Mitogen-activated protein kinase kinase kinase 2 OS=Mus musculus OX=10090 GN=Map3k2 PE=1 SV=2	Map3k2	0.95859	0.0135515	64.711	3	AKPS(0.041)S(0.959)PK	0.27622	1	1.12	0.949	0.856	0.755	0.858	1.462	1.541	0.764	1.704	0.766	0.998	1.305	0.796	0.902	1.936	0.882	1.708	0.88	0.847	0.674	1.106	Cluster1	0.329424537428768
Q6NV83	974	S	U2 snRNP-associated SURP motif-containing protein OS=Mus musculus OX=10090 GN=U2surp PE=1 SV=3	U2surp	0.96285	0.0227482	56.043	3	S(0.019)S(0.019)HKDS(0.963)PR	0.078469	2	1.192	1.024	0.774	0.832	0.768	1.409	1.376	0.649	1.835	0.644	1.008	1.182	0.812	0.756	1.694	1.075	1.82	1.083	0.859	0.698	1.333	Cluster1	0.392859399229264
Q6P1G2	751	S	Lysine-specific demethylase 2B OS=Mus musculus OX=10090 GN=Kdm2b PE=1 SV=1	Kdm2b	1	0.016558	56.359	4	RRS(1)DEHPK	0.27846	1	1.182	1.085	0.827	0.838	0.785	1.284	1.183	0.7	1.636	0.664	1.054	1.086	0.772	0.762	1.532	1.013	1.553	1.068	0.918	0.709	1.382	Cluster1	0.400520406053874
Q6P5F6	642	S	Zinc transporter ZIP10 OS=Mus musculus OX=10090 GN=Slc39a10 PE=1 SV=1	Slc39a10	1	0.000477947	97.163	5	KHS(1)HQWHHR	-0.32527	5	1.287	0.876	0.909	0.869	0.724	1.335	1.524	0.706	1.844	0.563	1.256	1.037	0.992	1.038	1.536	0.956	1.469	1.2	0.681	0.675	1.21	Cluster1	0.423220308727553
E9Q5F9	475	S	Histone-lysine N-methyltransferase SETD2 OS=Mus musculus OX=10090 GN=Setd2 PE=1 SV=1	Setd2	0.87744	0.0455448	40.589	3	RT(0.122)S(0.877)AHS(0.001)YR	1.0578	1	1.147	1.308	0.835	0.984	0.733	0.991	0.758	0.728	1.352	0.639	1.139	0.864	0.752	0.638	1.007	1.178	1.187	1.342	1.14	0.858	1.784	Cluster1	0.282071869559086
Q7TSC1	1104	S	Protein PRRC2A OS=Mus musculus OX=10090 GN=Prrc2a PE=1 SV=1	Prrc2a	0.998635	5.11386e-276	511.4	3	GS(0.999)ET(0.866)GS(0.109)ET(0.027)HESDLAPSDK	0.22853	9	1.04	1.099	1.292	0.983	0.539	1.049	0.955	1.242	1.946	0.518	2.397	1.009	0.894	1.176	1.067	0.761	0.812	1.824	1.057	0.945	2.039	Cluster1	0.242871652426151
Q7TSC1	1108	S	Protein PRRC2A OS=Mus musculus OX=10090 GN=Prrc2a PE=1 SV=1	Prrc2a	0.860536	1.21678e-103	375.94	2	GSET(0.001)GS(0.861)ET(0.139)HESDLAPSDK	0.11718	5	1.165	1.129	1.262	1.008	0.335	1.102	0.976	1.083	3.29	0.288	3.767	0.946	0.893	1.118	1.093	0.799	0.873	3.009	0.969	0.865	3.37	Cluster1	0.273313672693691
Q8BKG3	776	S	Inactive tyrosine-protein kinase 7 OS=Mus musculus OX=10090 GN=Ptk7 PE=1 SV=1	Ptk7	1	0.00768265	73.985	3	RHS(1)AGDR	0.10082	1	1.088	0.995	0.804	0.834	0.775	1.504	1.512	0.739	1.941	0.712	1.037	1.382	0.838	0.808	1.803	1.037	1.871	1.076	0.915	0.767	1.284	Cluster1	0.339305603021986
Q8BKI2	1315	S	Trinucleotide repeat-containing gene 6B protein OS=Mus musculus OX=10090 GN=Tnrc6b PE=1 SV=2	Tnrc6b	0.850858	0.00899907	60.255	4	HS(0.149)PS(0.851)HPVGPK	0.16492	1	1.509	0.825	1.04	1.079	0.549	0.998	1.21	0.689	1.818	0.364	1.894	0.661	1.308	1.261	0.925	1.037	0.96	1.965	0.547	0.715	1.503	Cluster1	0.320081073856996
Q8BTW9	148	S	Serine/threonine-protein kinase PAK 4 OS=Mus musculus OX=10090 GN=Pak4 PE=1 SV=1	Pak4	0.767824	0.00473921	71.263	3	ATGHSEAGS(0.232)GS(0.768)GDR	-0.17378	1	1.273	0.89	1.026	0.664	0.851	1.296	1.456	0.806	1.523	0.668	1.206	1.018	0.746	1.153	1.952	0.647	1.263	0.78	0.699	0.522	1.046	Cluster1	0.322317811904164
Q8BWJ3	1044	S	Phosphorylase b kinase regulatory subunit alpha, liver isoform OS=Mus musculus OX=10090 GN=Phka2 PE=1 SV=1	Phka2	0.956535	1.31864e-98	362.42	4	SSTPS(0.019)S(0.957)PT(0.023)GT(0.001)SSTDSGGQHLGWGEQQGQWLR	0.024304	2	1.035	1.168	1.275	1.052	0.467	1.003	0.859	1.232	2.148	0.451	2.73	0.969	0.901	1.092	0.953	0.825	0.787	2.253	1.129	1.016	2.501	Cluster1	0.240835138154167
A2AAY5	672	S	SH3 and PX domain-containing protein 2B OS=Mus musculus OX=10090 GN=Sh3pxd2b PE=1 SV=1	Sh3pxd2b	1	0.0276413	49.081	4	LRPAKS(1)QEK	-0.15633	1	1.123	0.768	0.864	0.989	0.822	1.433	1.866	0.769	1.743	0.732	1.051	1.276	1.288	1.125	1.449	1.145	1.659	1.203	0.684	0.881	0.934	Cluster2	0.334767506186806
Q8CJF9	825	S	Protein argonaute-3 OS=Mus musculus OX=10090 GN=Ago3 PE=2 SV=2	Ago3	1	6.39876e-22	235.86	4	YHLVDKEHDS(1)AEGSHVSGQSNGR	-0.8774	5	0.895	0.897	0.877	0.791	0.955	1.584	1.766	0.98	1.659	1.067	0.918	1.77	0.882	0.978	2.003	0.902	1.806	0.828	1.002	0.884	0.939	Cluster2	0.579628076786845
Q8K199	59	S	COX assembly mitochondrial protein 2 homolog OS=Mus musculus OX=10090 GN=Cmc2 PE=3 SV=1	Cmc2	1	0.0321714	51.286	3	S(1)REHGAAMR	0.78278	1	0.492	0.581	0.994	0.491	0.81	2.632	4.53	2.02	3.249	1.646	1.227	5.35	0.845	1.711	5.36	0.494	2.648	0.606	1.181	0.998	0.717	Cluster2	0.67954885879375
O08784	613	S	Treacle protein OS=Mus musculus OX=10090 GN=Tcof1 PE=1 SV=1	Tcof1	1	5.60059e-69	318.9	2	SDVDS(0.16)S(0.83)S(0.008)ES(0.001)ES(1)EGAAPSTPR	0.59469	9	1.203	0.405	1.32	0.955	1.087	1.03	2.543	1.097	0.948	0.904	1.214	0.856	2.358	3.259	1.079	0.723	0.78	0.879	0.337	0.794	0.373	Cluster2	0.219572355130747
Q8R4Z4	157	S	ETS translocation variant 3 OS=Mus musculus OX=10090 GN=Etv3 PE=1 SV=2	Etv3	0.93383	1.15197e-05	149.85	4	FHFPPLDS(0.934)HS(0.066)PTGDVQPGR	0.026841	2	0.738	0.839	0.925	0.749	0.921	1.829	2.18	1.253	1.986	1.248	1.004	2.478	0.893	1.103	2.442	0.81	1.977	0.813	1.137	1.015	0.911	Cluster2	0.711076668262927
Q8VCD5	53	S	Mediator of RNA polymerase II transcription subunit 17 OS=Mus musculus OX=10090 GN=Med17 PE=1 SV=1	Med17	0.956047	9.32322e-09	119.16	4	IDFS(0.062)QGS(0.956)GS(0.982)EEEEAAGPDGDAPDWGGAGADQDDEEGLVK	-0.2352	3	0.849	0.678	1.003	1.256	1.224	0.989	1.459	1.181	0.808	1.442	0.819	1.165	1.853	1.479	0.787	1.252	0.986	1.026	0.799	1.479	0.554	Cluster2	0.240614486344146
Q8VDZ4	529	S	Palmitoyltransferase ZDHHC5 OS=Mus musculus OX=10090 GN=Zdhhc5 PE=1 SV=1	Zdhhc5	0.999999	1.10837e-05	146.81	4	LLPTGPPHREPS(1)PVR	0.43645	2	0.909	0.911	0.849	0.812	1.025	1.495	1.641	0.934	1.459	1.128	0.828	1.645	0.891	0.932	1.841	0.956	1.761	0.792	1.002	0.893	0.889	Cluster2	0.489075785336882
Q8VIJ6	488	S	Splicing factor, proline- and glutamine-rich OS=Mus musculus OX=10090 GN=Sfpq PE=1 SV=1	Sfpq	1	0.000100857	119.39	3	WKS(1)LDEMEK	-0.35836	1	0.776	0.835	0.994	1.32	0.881	1.193	1.429	1.281	1.354	1.135	1.128	1.537	1.581	1.19	0.904	1.328	1.2	1.498	1.076	1.701	0.948	Cluster2	0.35251813946972
O09000	261	S	Nuclear receptor coactivator 3 OS=Mus musculus OX=10090 GN=Ncoa3 PE=1 SV=2	Ncoa3	0.833	0.00632928	67.43	3	VTAPFPS(0.135)S(0.833)PES(0.026)FIT(0.007)R	0.25007	1	1.089	0.637	1.095	0.966	1.044	1.17	1.837	1.006	1.121	0.959	1.049	1.074	1.516	1.719	1.211	0.882	1.068	0.925	0.585	0.887	0.61	Cluster2	0.280862716677565
Q921R4	97	S	DnaJ homolog subfamily C member 14 OS=Mus musculus OX=10090 GN=Dnajc14 PE=2 SV=2	Dnajc14	0.999792	8.82136e-15	158.12	3	GGGYPDES(0.025)ET(0.975)GS(1)EESGVDQELSR	-0.97464	3	0.756	0.945	0.941	0.954	0.873	1.531	1.62	1.245	1.754	1.155	1.078	2.025	1.01	0.996	1.605	1.014	1.627	1.093	1.25	1.262	1.082	Cluster2	0.631427173343317
Q924A2	2284	S	Protein capicua homolog OS=Mus musculus OX=10090 GN=Cic PE=1 SV=2	Cic	0.926415	4.33896e-15	212.66	3	FAELPEFRPEEVLPS(0.997)PT(0.003)LQSLAT(0.074)S(0.926)PR	0.0082058	3	0.923	0.882	1.379	1.13	0.724	0.962	1.091	1.494	1.329	0.784	1.905	1.042	1.281	1.563	0.851	0.819	0.698	1.561	0.956	1.224	1.218	Cluster2	0.202033412036778
Q99K70	381	S	Ras-related GTP-binding protein C OS=Mus musculus OX=10090 GN=Rragc PE=1 SV=1	Rragc	0.847369	0.00234419	77.222	3	S(0.001)CS(0.001)HQT(0.151)S(0.847)APSLK	-0.50213	1	0.646	1.117	1.079	0.665	0.893	1.601	1.433	1.67	1.793	1.382	1.208	2.478	0.595	0.966	2.408	0.616	1.484	0.745	1.729	1.029	1.251	Cluster2	0.360083451465103
Q9D0E1	452	S	Heterogeneous nuclear ribonucleoprotein M OS=Mus musculus OX=10090 GN=Hnrnpm PE=1 SV=3	Hnrnpm	0.841355	0.00787735	89.698	2	MGS(0.159)S(0.841)IER	-0.39383	1	0.996	0.794	0.89	0.934	0.896	1.49	1.877	0.894	1.663	0.9	0.993	1.496	1.176	1.121	1.595	1.049	1.674	1.042	0.797	0.938	0.886	Cluster2	0.556180164717914
Q9DBS9	733	S	Oxysterol-binding protein-related protein 3 OS=Mus musculus OX=10090 GN=Osbpl3 PE=1 SV=2	Osbpl3	0.987867	2.12855e-85	343.26	2	WHESIYCGGAS(0.012)S(0.988)STCVWR	-0.64269	2	0.763	0.864	0.974	1.291	0.825	1.283	1.485	1.277	1.555	1.081	1.181	1.682	1.494	1.127	0.994	1.325	1.317	1.565	1.132	1.692	1.047	Cluster2	0.388684458148054
Q9ES00	105	S	Ubiquitin conjugation factor E4 B OS=Mus musculus OX=10090 GN=Ube4b PE=1 SV=3	Ube4b	0.974713	0.000105505	122.01	2	S(0.025)QS(0.975)MDIDGVSCEK	-0.78792	2	0.695	0.92	1.068	0.956	1.013	1.349	1.466	1.537	1.332	1.458	1.054	1.941	1.039	1.161	1.411	0.895	1.263	0.944	1.324	1.376	0.908	Cluster2	0.484849478119445
Q9JKK1	2	S	Syntaxin-6 OS=Mus musculus OX=10090 GN=Stx6 PE=1 SV=1	Stx6	1	2.02421e-05	95.85	2	S(1)MEDPFFVVK	-0.94077	2	0.985	0.706	1.133	0.932	0.839	1.405	1.99	1.15	1.675	0.852	1.35	1.426	1.32	1.605	1.508	0.823	1.24	1.111	0.717	0.946	0.841	Cluster2	0.479448667331888
Q9QZQ1	655	S	Afadin OS=Mus musculus OX=10090 GN=Afdn PE=1 SV=3	Afdn	0.993343	3.71227e-05	105.91	3	YVLSSQHRPDIS(0.993)PT(0.007)ER	-2.1002	1	0.712	0.747	0.886	0.715	0.706	2.234	2.991	1.244	3.164	0.992	1.255	3.138	0.957	1.186	3.124	0.807	2.521	1.013	1.049	1.004	1.058	Cluster2	0.732394164088394
Q9R0L6	2024	S	Pericentriolar material 1 protein OS=Mus musculus OX=10090 GN=Pcm1 PE=1 SV=2	Pcm1	1	0.000180422	119.27	2	EPETVGAQS(1)I	-1.8107	1	0.928	0.752	0.899	0.753	0.966	1.703	2.265	0.969	1.763	1.041	0.931	1.835	1.001	1.195	2.262	0.838	1.894	0.78	0.81	0.811	0.778	Cluster2	0.597393623119293
Q9R0L6	988	S	Pericentriolar material 1 protein OS=Mus musculus OX=10090 GN=Pcm1 PE=1 SV=2	Pcm1	0.994719	0.000307481	100.19	3	WVS(0.001)ELS(0.995)Y(0.004)IEEK	0.0097468	1	0.744	0.773	0.935	1.28	0.86	1.406	1.819	1.257	1.635	1.156	1.087	1.89	1.656	1.21	1.098	1.369	1.504	1.488	1.039	1.72	0.899	Cluster2	0.452224640980422
Q9Z0F8	794	S	Disintegrin and metalloproteinase domain-containing protein 17 OS=Mus musculus OX=10090 GN=Adam17 PE=1 SV=3	Adam17	0.999911	4.72532e-07	167.21	3	S(1)FEDLTDHPVTR	-0.21845	1	0.794	0.701	1.302	0.933	0.899	1.371	1.956	1.64	1.525	1.132	1.448	1.727	1.331	1.857	1.469	0.717	1.053	1.038	0.883	1.175	0.78	Cluster2	0.469312162085381
Q9Z0U1	960	S	Tight junction protein ZO-2 OS=Mus musculus OX=10090 GN=Tjp2 PE=1 SV=2	Tjp2	1	0.0165114	79.16	2	AAS(1)RDQLR	0.010418	1	0.872	0.881	0.932	0.816	0.996	1.503	1.706	1.069	1.509	1.142	0.936	1.724	0.926	1.058	1.842	0.876	1.613	0.819	1.01	0.936	0.885	Cluster2	0.654586632363469
O70133	136	S	ATP-dependent RNA helicase A OS=Mus musculus OX=10090 GN=Dhx9 PE=1 SV=2	Dhx9	0.776024	0.000146163	99.319	3	AEENNSGVES(0.009)S(0.138)GY(0.072)GS(0.776)PGPT(0.005)WDR	0.17828	1	0.798	0.892	0.897	0.879	0.959	1.575	1.766	1.124	1.642	1.202	0.935	1.974	0.985	1.006	1.792	0.98	1.756	0.917	1.118	1.102	0.93	Cluster2	0.700909324956398
P03977	87	T	Ig kappa chain V-III region 50S10.1 OS=Mus musculus OX=10090 PE=1 SV=1	--	0.997832	0.00475697	60.971	3	FSGSGSGTDFSLNIHPMEEDDT(0.998)AMY(0.001)FCQQS(0.001)K	1.6536	33	0.484	0.415	1.322	1.667	0.607	1.505	3.627	2.731	2.479	1.254	2.178	3.11	4.017	3.186	0.903	1.261	1.138	2.746	0.857	3.444	0.684	Cluster2	0.369139568571581
Q61851	221	T	Fibroblast growth factor receptor 3 OS=Mus musculus OX=10090 GN=Fgfr3 PE=1 SV=1	Fgfr3	0.984769	0.00964146	67.456	3	GNY(0.015)T(0.985)CVVENK	-1.9005	1	0.8	0.68	1.094	1.111	1.266	1.049	1.543	1.368	0.829	1.582	0.864	1.311	1.634	1.609	0.944	1.016	0.959	0.878	0.85	1.389	0.537	Cluster2	0.261528982810986
Q8BTI8	1428	T	Serine/arginine repetitive matrix protein 2 OS=Mus musculus OX=10090 GN=Srrm2 PE=1 SV=3	Srrm2	0.964937	0.0121149	67.726	3	DTPQT(0.965)PS(0.035)R	-0.35067	1	0.911	0.809	0.792	0.795	1.307	1.386	1.713	0.869	1.06	1.435	0.606	1.521	0.983	0.979	1.743	1.004	1.75	0.608	0.888	0.873	0.619	Cluster2	0.294308841010123
Q9D824	481	T	Pre-mRNA 3'-end-processing factor FIP1 OS=Mus musculus OX=10090 GN=Fip1l1 PE=1 SV=1	Fip1l1	0.764921	4.34674e-05	127.32	3	DHS(0.235)PT(0.765)PSVFNS(1)DEER	-0.03433	4	0.727	0.751	1.058	1.163	1.062	1.24	1.651	1.455	1.168	1.461	0.996	1.706	1.549	1.409	1.066	1.099	1.172	1.095	1.033	1.6	0.707	Cluster2	0.399724748603011
A2AJI0	243	S	MAP7 domain-containing protein 1 OS=Mus musculus OX=10090 GN=Map7d1 PE=1 SV=1	Map7d1	0.973311	1.31811e-05	157.11	3	WSWAGALHHS(0.027)S(0.973)PGR	-0.13543	4	0.804	0.808	0.945	1.296	0.849	1.298	1.606	1.175	1.529	1.056	1.113	1.614	1.604	1.17	1.002	1.371	1.374	1.527	1.005	1.612	0.952	Cluster2	0.402687448773459
A2ALK8	425	S	Tyrosine-protein phosphatase non-receptor type 3 OS=Mus musculus OX=10090 GN=Ptpn3 PE=1 SV=1	Ptpn3	0.973623	5.83541e-05	109.42	4	GPLS(0.009)PKDS(0.974)DS(0.017)EVS(0.015)QNHS(0.985)PHR	-0.98181	2	0.691	0.86	0.755	0.676	0.801	2.218	2.579	1.093	2.769	1.159	0.943	3.21	0.786	0.878	3.281	0.895	2.938	0.844	1.245	0.978	1.074	Cluster2	0.612392872242841
P11031	17	S	Activated RNA polymerase II transcriptional coactivator p15 OS=Mus musculus OX=10090 GN=Sub1 PE=1 SV=3	Sub1	0.99964	1.94246e-103	374.48	3	ELVS(0.001)S(0.004)S(0.021)S(0.117)S(0.703)GS(0.154)DS(1)DS(1)EVEK	-2.0202	32	0.534	1.035	1.117	1.014	1.16	1.14	1.101	2.092	0.983	2.172	0.963	2.135	0.98	1.079	1.124	0.908	1.021	0.874	1.938	1.899	0.892	Cluster2	0.223779812787457
P11031	19	S	Activated RNA polymerase II transcriptional coactivator p15 OS=Mus musculus OX=10090 GN=Sub1 PE=1 SV=3	Sub1	1	4.26003e-143	404.07	2	ELVSSSSSGS(0.001)DS(0.999)DS(1)EVEK	1.5745	12	0.26	1.085	1.122	0.901	1.2	1.432	1.32	4.315	1.193	4.615	0.935	5.508	0.83	1.034	1.589	0.803	1.276	0.751	4.173	3.465	0.904	Cluster2	0.250112660049794
P60521	10	S	Gamma-aminobutyric acid receptor-associated protein-like 2 OS=Mus musculus OX=10090 GN=Gabarapl2 PE=1 SV=1	Gabarapl2	1	0.000357386	121.6	4	WMFKEDHS(1)LEHR	-0.30478	4	0.924	0.798	0.828	1.295	0.847	1.309	1.64	0.896	1.545	0.917	0.978	1.417	1.623	1.038	1.011	1.564	1.581	1.529	0.864	1.402	0.942	Cluster2	0.350725674638094
P62821	78	S	Ras-related protein Rab-1A OS=Mus musculus OX=10090 GN=Rab1A PE=1 SV=3	Rab1A	0.84278	0.00469897	88.364	2	TIT(0.079)S(0.843)S(0.079)YYR	-0.98167	1	0.741	0.748	0.816	0.738	0.748	2.209	2.953	1.101	2.953	1.009	1.091	2.981	0.987	1.091	2.993	0.904	2.707	0.987	1.009	0.996	1	Cluster2	0.723968495128478
P97868	1329	S	E3 ubiquitin-protein ligase RBBP6 OS=Mus musculus OX=10090 GN=Rbbp6 PE=1 SV=5	Rbbp6	1	3.33115e-07	170.53	4	WDKDDFES(1)EEEDVK	0.13555	2	0.736	0.942	0.858	1.222	0.902	1.34	1.423	1.166	1.486	1.226	0.951	1.821	1.297	0.911	1.097	1.424	1.562	1.355	1.28	1.66	1.044	Cluster2	0.398763090837122
Q03172	2265	S	Zinc finger protein 40 OS=Mus musculus OX=10090 GN=Hivep1 PE=1 SV=1	Hivep1	0.845397	3.74791e-05	139.73	4	ARQS(0.845)T(0.155)EKDEHEQAPPADTPR	0.13053	1	0.785	0.776	1.247	0.797	1.05	1.345	1.733	1.589	1.281	1.338	1.188	1.713	1.027	1.607	1.688	0.639	1.079	0.759	0.989	1.015	0.739	Cluster2	0.425361726524089
Q05D44	580	S	Eukaryotic translation initiation factor 5B OS=Mus musculus OX=10090 GN=Eif5b PE=1 SV=2	Eif5b	0.993803	3.79882e-15	210.8	3	AGDT(0.006)KPS(0.994)KDASSDSEYDSDDDR	0.17523	3	0.738	0.994	1.002	0.779	1.285	1.202	1.209	1.358	0.935	1.741	0.78	1.629	0.784	1.008	1.543	0.777	1.2	0.606	1.347	1.056	0.774	Cluster2	0.219850787692524
B1AZP2	763	S	Disks large-associated protein 4 OS=Mus musculus OX=10090 GN=Dlgap4 PE=1 SV=1	Dlgap4	0.99472	3.71682e-19	184.26	4	NLS(0.995)Y(0.001)GDNS(0.004)DPALEASSLPPPDPWLETSSSSPAEPAQPGACR	-0.32937	2	0.953	0.537	1.261	0.92	1.272	1.056	1.966	1.323	0.83	1.335	0.991	1.108	1.713	2.348	1.148	0.73	0.837	0.723	0.563	0.965	0.422	Cluster2	0.235198711279721
Q3U5F4	61	S	YrdC domain-containing protein, mitochondrial OS=Mus musculus OX=10090 GN=Yrdc PE=1 SV=1	Yrdc	0.999999	0.00480751	71.073	3	LPESEPVEAAS(1)PER	-1.7063	1	0.798	0.805	0.856	0.84	0.825	1.877	2.332	1.073	2.275	1.034	1.038	2.352	1.043	1.063	2.235	0.981	2.193	1.018	1.009	1.053	0.976	Cluster2	0.732102246401671
Q3UH06	161	S	Ras-responsive element-binding protein 1 OS=Mus musculus OX=10090 GN=Rreb1 PE=1 SV=2	Rreb1	0.999935	0.00521514	70.121	3	DTNSTTAAAPPS(1)PLKR	0.68834	1	0.777	0.781	0.865	0.731	0.909	1.937	2.48	1.113	2.131	1.17	0.952	2.493	0.936	1.108	2.65	0.845	2.239	0.804	1.005	0.941	0.859	Cluster2	0.71654854778486
Q3UYV9	674	S	Nuclear cap-binding protein subunit 1 OS=Mus musculus OX=10090 GN=Ncbp1 PE=1 SV=2	Ncbp1	1	0.000832844	120.86	2	RRS(1)DDDDR	0.037505	2	1.027	0.973	0.809	0.999	0.766	1.426	1.466	0.788	1.862	0.746	1.056	1.389	1.027	0.831	1.427	1.235	1.763	1.304	0.947	0.973	1.27	Cluster2	0.293646787756026
Q569Z6	924	S	Thyroid hormone receptor-associated protein 3 OS=Mus musculus OX=10090 GN=Thrap3 PE=1 SV=1	Thrap3	1	2.80449e-100	336.23	5	WAHDKFS(1)GEEGEIEDDES(0.969)GT(0.031)ENREEK	-0.6064	25	0.799	0.785	0.973	1.389	0.787	1.266	1.613	1.218	1.609	0.985	1.236	1.584	1.769	1.239	0.911	1.428	1.301	1.765	0.982	1.738	0.997	Cluster2	0.357094492799145
Q569Z6	572	S	Thyroid hormone receptor-associated protein 3 OS=Mus musculus OX=10090 GN=Thrap3 PE=1 SV=1	Thrap3	1	1.82344e-12	192.95	2	MDS(1)FDEDLAR	-1.1765	1	0.769	0.838	1.083	0.849	0.921	1.54	1.838	1.408	1.672	1.198	1.176	2.003	1.013	1.292	1.814	0.784	1.422	0.922	1.09	1.104	0.91	Cluster2	0.708785283281051
Q569Z6	860	S	Thyroid hormone receptor-associated protein 3 OS=Mus musculus OX=10090 GN=Thrap3 PE=1 SV=1	Thrap3	1	0.000106464	127.97	3	S(1)REEEWDPEYTPK	0.5398	3	0.861	0.868	1.095	0.821	0.905	1.451	1.672	1.272	1.603	1.051	1.21	1.685	0.946	1.262	1.767	0.75	1.325	0.907	1.008	0.954	0.959	Cluster2	0.652540082574983
Q61122	179	S	NGFI-A-binding protein 1 OS=Mus musculus OX=10090 GN=Nab1 PE=1 SV=2	Nab1	0.99999	2.8662e-10	189.09	4	LWQGHHATES(0.001)EHS(0.345)LS(0.654)PADLGS(1)PAS(1)PK	2.3977	4	0.76	0.861	0.849	1.916	0.849	0.766	0.89	1.117	0.902	1.117	1	1.008	2.225	0.986	0.4	2.257	0.902	2.257	1.133	2.521	1.014	Cluster2	0.186156607192756
Q69Z38	825	S	Inactive tyrosine-protein kinase PEAK1 OS=Mus musculus OX=10090 GN=Peak1 PE=1 SV=4	Peak1	0.927033	5.65451e-41	282.94	4	SLFTS(0.001)QS(0.072)S(0.927)GEGEAHQTTESPTAK	0.044162	2	0.859	0.723	1.235	0.899	0.965	1.319	1.824	1.438	1.367	1.123	1.28	1.536	1.243	1.708	1.467	0.728	1.068	0.932	0.842	1.047	0.749	Cluster2	0.465505663019764
Q6NV83	788	S	U2 snRNP-associated SURP motif-containing protein OS=Mus musculus OX=10090 GN=U2surp PE=1 SV=3	U2surp	1	9.16771e-138	400.47	4	WELFDQHEES(1)EEEENQNQEEES(1)EDEEDTQSSK	-0.50846	2	0.762	0.733	1.011	1.494	0.796	1.204	1.643	1.327	1.513	1.045	1.27	1.58	2.038	1.379	0.806	1.478	1.191	1.877	0.962	1.961	0.921	Cluster2	0.326548383440841
Q6NV83	800	S	U2 snRNP-associated SURP motif-containing protein OS=Mus musculus OX=10090 GN=U2surp PE=1 SV=3	U2surp	0.999998	9.91435e-82	341.59	4	WELFDQHEESEEEENQNQEEES(1)EDEEDTQSSK	-0.41814	2	0.704	0.776	0.979	1.446	0.846	1.249	1.61	1.391	1.476	1.202	1.157	1.774	1.863	1.262	0.864	1.477	1.276	1.709	1.102	2.054	0.917	Cluster2	0.349256000820292
Q6NVE8	405	S	WD repeat-containing protein 44 OS=Mus musculus OX=10090 GN=Wdr44 PE=1 SV=1	Wdr44	0.999999	1.45273e-192	444.45	3	EYVSNDATQS(1)DDEEK	-0.043457	7	1.025	0.539	1.188	1.005	1.209	1.033	1.917	1.159	0.854	1.18	0.983	1.008	1.865	2.204	1.028	0.846	0.87	0.831	0.526	0.98	0.446	Cluster2	0.231668259687598
Q6P9S1	279	S	ATM interactor OS=Mus musculus OX=10090 GN=Atmin PE=2 SV=2	Atmin	0.97293	0.0122353	61.435	3	KQS(0.973)VAT(0.027)PPR	0.41171	1	0.877	0.864	0.915	0.812	0.764	1.768	2.046	1.043	2.314	0.871	1.198	2.016	0.94	1.059	2.177	0.887	1.932	1.063	0.985	0.926	1.131	Cluster2	0.622551735466122
Q6PB70	665	S	Anoctamin-8 OS=Mus musculus OX=10090 GN=Ano8 PE=1 SV=3	Ano8	0.999698	1.38484e-10	170.47	3	GLEPGVFTLAEEDDEPEGPPGS(1)PGPEPQTVLLR	-0.051336	2	0.638	1.059	1.074	0.972	1.122	1.135	1.072	1.683	1.012	1.759	0.957	1.779	0.918	1.014	1.168	0.905	1.057	0.866	1.66	1.524	0.944	Cluster2	0.226321348113642
Q6PD21	382	S	SH2 domain-containing adapter protein B OS=Mus musculus OX=10090 GN=Shb PE=1 SV=2	Shb	1	0.0052314	68.978	3	HGS(1)PEFCGILGER	-0.37467	1	1.056	0.824	1.344	0.829	0.75	1.198	1.454	1.273	1.597	0.71	1.792	1.134	1.006	1.631	1.445	0.617	0.891	1.105	0.78	0.785	1.099	Cluster2	0.248182442065761
Q6PGG6	459	S	Guanine nucleotide-binding protein-like 3-like protein OS=Mus musculus OX=10090 GN=Gnl3l PE=1 SV=1	Gnl3l	1	0.00076431	105.98	3	WLHS(1)PLVK	-0.36935	1	0.828	0.8	0.962	1.27	0.625	1.516	1.895	1.162	2.426	0.755	1.539	1.831	1.588	1.202	1.194	1.32	1.576	2.032	0.966	1.534	1.28	Cluster2	0.3961642807023
Q7TNC4	383	S	Putative RNA-binding protein Luc7-like 2 OS=Mus musculus OX=10090 GN=Luc7l2 PE=1 SV=1	Luc7l2	0.980606	0.00723109	68.83	3	S(0.038)EDRRS(0.981)S(0.982)EER	-0.64133	2	1.043	0.691	1.067	0.888	0.953	1.358	1.965	1.023	1.425	0.914	1.12	1.302	1.285	1.544	1.529	0.832	1.273	0.932	0.663	0.851	0.725	Cluster2	0.419040128303895
Q7TNC4	384	S	Putative RNA-binding protein Luc7-like 2 OS=Mus musculus OX=10090 GN=Luc7l2 PE=1 SV=1	Luc7l2	0.981624	0.00723109	68.83	3	S(0.038)EDRRS(0.981)S(0.982)EER	-0.64133	2	1.043	0.691	1.067	0.888	0.953	1.358	1.965	1.023	1.425	0.914	1.12	1.302	1.285	1.544	1.529	0.832	1.273	0.932	0.663	0.851	0.725	Cluster2	0.419040128303895
E9Q9R9	1079	S	Disks large homolog 5 OS=Mus musculus OX=10090 GN=Dlg5 PE=1 SV=1	Dlg5	0.996678	1.28736e-24	250.86	3	IASS(0.003)YHS(0.997)EGDGDTSYLPAK	-0.38379	1	0.843	0.795	1.077	0.882	0.989	1.413	1.777	1.278	1.429	1.173	1.089	1.676	1.109	1.355	1.602	0.819	1.312	0.892	0.943	1.046	0.804	Cluster2	0.679607264875637
Q8BUR4	1704	S	Dedicator of cytokinesis protein 1 OS=Mus musculus OX=10090 GN=Dock1 PE=1 SV=3	Dock1	1	0.000200935	102.38	4	RNS(1)KHQEIFDK	-0.048494	3	0.759	0.834	0.838	0.802	0.994	1.773	2.126	1.104	1.784	1.31	0.843	2.336	0.962	1.005	2.211	0.957	2.116	0.807	1.099	1.057	0.839	Cluster2	0.661831993967219
Q8BVF2	237	S	Phosducin-like protein 3 OS=Mus musculus OX=10090 GN=Pdcl3 PE=1 SV=1	Pdcl3	0.887726	0.0494284	43.512	2	RDS(0.112)DS(0.888)EDD	-0.17119	1	1.025	0.939	0.957	0.637	0.877	1.564	1.666	0.934	1.783	0.856	1.091	1.526	0.678	1.019	2.455	0.666	1.634	0.726	0.916	0.621	1.071	Cluster2	0.280984782159727
F8VPU2	892	S	FERM, ARHGEF and pleckstrin domain-containing protein 1 OS=Mus musculus OX=10090 GN=Farp1 PE=1 SV=1	Farp1	1	1.46177e-216	463.26	2	SPDEATAADQES(1)EDDLSASR	-0.46551	5	1.259	0.131	1.17	1.073	1.265	1.101	8.405	0.929	0.87	1.005	0.925	0.875	8.191	8.931	1.026	0.917	0.941	0.848	0.104	0.852	0.104	Cluster2	0.237069808897438
G5E8P1	25	S	Bromodomain-containing protein 1 OS=Mus musculus OX=10090 GN=Brd1 PE=1 SV=1	Brd1	0.903435	0.00126729	81.016	3	HPS(0.744)S(0.255)PCS(0.016)IKHS(0.903)PT(0.082)R	-1.0141	3	1.15	0.951	0.747	0.855	1.586	0.71	0.747	0.65	0.448	1.379	0.471	0.617	0.899	0.785	0.83	1.145	0.95	0.539	0.827	0.743	0.6	Cluster3	0.242450251203839
Q8CFK2	358	S	Transcription factor IIIB 90 kDa subunit OS=Mus musculus OX=10090 GN=Brf1 PE=1 SV=1	Brf1	0.960484	0.000319375	128.09	2	DGSGEDAT(0.018)S(0.021)S(0.96)PR	-0.61653	1	1.206	1.139	0.94	0.602	1.127	0.986	0.866	0.779	0.875	0.934	0.834	0.818	0.529	0.825	1.638	0.64	1.049	0.534	0.944	0.499	1.011	Cluster3	0.417408836220017
Q8R0T2	36	S	Zinc finger protein 768 OS=Mus musculus OX=10090 GN=Znf768 PE=1 SV=1	Znf768	0.840261	0.000169181	99.343	3	DPAGNT(0.16)S(0.84)ENEEGEISQR	-0.080992	1	1.214	0.963	1	0.704	1.289	0.831	0.863	0.824	0.645	1.062	0.776	0.685	0.731	1.038	1.18	0.704	0.831	0.546	0.793	0.58	0.747	Cluster3	0.361187752381192
Q91YM2	1134	S	Rho GTPase-activating protein 35 OS=Mus musculus OX=10090 GN=Arhgap35 PE=1 SV=3	Arhgap35	0.999963	5.34491e-166	431.13	2	AQSNGSGNGS(1)DSEMDT(0.045)S(0.352)S(0.604)LER	0.27831	12	1.072	1.1	1.264	0.238	1.222	1.104	1.004	1.179	0.903	1.14	1.034	1.03	0.216	1.149	4.639	0.188	0.873	0.195	1.026	0.222	0.9	Cluster3	0.424441791270085
Q923D5	279	S	WW domain-binding protein 11 OS=Mus musculus OX=10090 GN=Wbp11 PE=1 SV=2	Wbp11	0.999715	1.12922e-66	323.45	4	HDDS(0.002)T(0.015)EDS(0.983)DT(1)DRS(1)DAESDGDEFGHR	0.92695	7	1.239	1.322	0.902	0.828	0.935	0.774	0.585	0.728	0.828	0.755	0.965	0.625	0.626	0.682	0.935	0.918	0.858	0.886	1.067	0.668	1.414	Cluster3	0.212553583924578
Q9CR00	2	S	26S proteasome non-ATPase regulatory subunit 9 OS=Mus musculus OX=10090 GN=Psmd9 PE=1 SV=1	Psmd9	1	0.000483465	79.116	2	S(1)GEDVPHR	0.19867	2	1.409	0.828	1.046	0.642	1.108	0.966	1.167	0.742	0.872	0.786	0.944	0.686	0.775	1.263	1.505	0.614	0.924	0.579	0.588	0.456	0.747	Cluster3	0.367133696355273
Q9CS00	82	S	Cactin OS=Mus musculus OX=10090 GN=Cactin PE=1 SV=2	Cactin	1	0.00775839	69.01	3	GRRS(1)DS(1)EGEQR	0.11933	2	0.956	1.158	1.028	0.638	0.946	1.274	1.1	1.075	1.347	0.99	1.087	1.333	0.551	0.888	1.997	0.621	1.239	0.674	1.211	0.667	1.224	Cluster3	0.272499603105564
Q9D2U5	22	S	N-alpha-acetyltransferase 38, NatC auxiliary subunit OS=Mus musculus OX=10090 GN=Naa38 PE=1 SV=1	Naa38	0.989874	2.25344e-43	292.69	3	RQS(0.99)S(0.003)S(0.007)SAGDS(1)DGEQEDSPATR	0.1331	11	1.3	0.997	1.22	0.64	0.935	0.909	0.912	0.938	0.972	0.719	1.305	0.699	0.642	1.224	1.42	0.525	0.745	0.684	0.767	0.492	1.066	Cluster3	0.343976913678529
Q9ERU9	1154	S	E3 SUMO-protein ligase RanBP2 OS=Mus musculus OX=10090 GN=Ranbp2 PE=1 SV=2	Ranbp2	0.999948	5.51654e-161	425.23	5	SHETDGGS(1)AHGDEEDDGPHFEPVVPLPDKIEVK	-0.79203	8	0.999	1.059	1.242	0.53	1.193	0.977	0.923	1.243	0.819	1.194	1.041	0.978	0.5	1.173	1.843	0.427	0.787	0.444	1.06	0.531	0.888	Cluster3	0.358215791317517
Q9R0L6	1432	S	Pericentriolar material 1 protein OS=Mus musculus OX=10090 GN=Pcm1 PE=1 SV=2	Pcm1	1	0.000166922	123.75	2	HIS(1)ES(1)DER	0.02622	3	0.731	1.168	1.084	0.542	1.033	1.443	1.235	1.483	1.397	1.413	1.049	1.974	0.464	0.928	2.662	0.5	1.331	0.525	1.598	0.741	1.131	Cluster3	0.235117265676102
Q9R210	121	S	Transcription factor EB OS=Mus musculus OX=10090 GN=Tfeb PE=1 SV=2	Tfeb	1	1.6193e-05	156.92	3	PAPAAS(1)PGVR	0.57503	4	1.23	1.062	0.811	0.82	1.308	0.768	0.723	0.659	0.587	1.063	0.62	0.624	0.772	0.764	0.937	1.011	0.947	0.627	0.863	0.667	0.812	Cluster3	0.260315401835066
Q9Z1B8	507	S	PHD finger protein 1 OS=Mus musculus OX=10090 GN=Phf1 PE=1 SV=2	Phf1	1	0.00774895	66.267	3	HS(1)PPS(1)PLCR	-0.23369	3	1.31	0.996	0.996	0.832	1.142	0.725	0.728	0.76	0.635	0.872	0.872	0.553	0.835	1	0.871	0.835	0.728	0.729	0.76	0.635	0.872	Cluster3	0.265671885157988
B2RQC6	1833	T	CAD protein OS=Mus musculus OX=10090 GN=Cad PE=1 SV=1	Cad	0.906079	1.64606e-15	216.53	4	KWPQGVVPQPPPSTPAT(0.003)T(0.002)EIT(0.009)T(0.081)T(0.906)PERPR	0.76867	9	0.987	1.024	1.153	0.602	1.22	1.012	0.988	1.168	0.83	1.236	0.945	1.025	0.588	1.126	1.681	0.522	0.878	0.493	1.037	0.61	0.839	Cluster3	0.373294454431236
Q7TSY8	26	T	Shugoshin 2 OS=Mus musculus OX=10090 GN=Sgo2 PE=1 SV=1	Sgo2	0.995206	0.00385574	78.486	3	T(0.995)NLNVS(0.005)LASK	0.084089	1	1.405	0.873	0.953	0.676	1.158	0.936	1.072	0.678	0.808	0.824	0.823	0.666	0.774	1.092	1.385	0.709	0.982	0.584	0.621	0.481	0.754	Cluster3	0.354030182461678
Q80W88	443	T	Homeobox and leucine zipper protein Homez OS=Mus musculus OX=10090 GN=Homez PE=1 SV=2	Homez	1	0.00370497	77.13	3	T(1)PPLPAPPPPPDIR	0.22888	1	0.968	1.121	1.063	0.612	1.146	1.09	0.972	1.098	0.951	1.184	0.928	1.126	0.546	0.948	1.781	0.576	1.025	0.534	1.158	0.632	0.978	Cluster3	0.367919718732799
Q99KD5	8	T	Protein unc-45 homolog A OS=Mus musculus OX=10090 GN=Unc45a PE=1 SV=2	Unc45a	1	0.0001531	120.87	3	TVSGPET(1)PEPR	0.035831	1	1.066	0.577	1.142	0.855	1.361	1	1.733	1.071	0.735	1.277	0.839	0.938	1.482	1.979	1.17	0.749	0.876	0.628	0.541	0.802	0.424	Cluster3	0.244075795385855
Q9JK23	32	T	Proteasome assembly chaperone 1 OS=Mus musculus OX=10090 GN=Psmg1 PE=1 SV=1	Psmg1	1	0.0112039	77.533	3	RDT(1)PEDR	1.1482	1	1.226	0.908	0.967	0.676	1.057	1.167	1.285	0.789	1.104	0.862	0.915	0.952	0.744	1.065	1.726	0.699	1.207	0.64	0.741	0.551	0.859	Cluster3	0.332023455742005
Q06180	32	Y	Tyrosine-protein phosphatase non-receptor type 2 OS=Mus musculus OX=10090 GN=Ptpn2 PE=1 SV=2	Ptpn2	1	9.93872e-06	136.96	3	NESHDY(1)PHR	-0.33308	1	1.197	1.023	0.914	0.65	1.206	1.01	0.987	0.764	0.837	1.008	0.758	0.844	0.635	0.893	1.554	0.711	1.105	0.539	0.855	0.543	0.848	Cluster3	0.428487319327798
P40201	1690	S	Chromodomain-helicase-DNA-binding protein 1 OS=Mus musculus OX=10090 GN=Chd1 PE=1 SV=3	Chd1	0.9996	0.00116996	84.892	3	S(1)PFEHSAEHR	1.234	1	1.056	1.065	1.013	0.636	0.976	1.255	1.178	0.959	1.286	0.924	1.038	1.188	0.597	0.951	1.973	0.628	1.239	0.652	1.009	0.602	1.091	Cluster3	0.314560595887035
P45591	3	S	Cofilin-2 OS=Mus musculus OX=10090 GN=Cfl2 PE=1 SV=1	Cfl2	0.999885	1.72587e-10	145.17	2	AS(1)GVTVNDEVIK	-0.29314	5	1.305	0.98	1.172	0.855	1.038	0.651	0.664	0.898	0.627	0.795	1.129	0.499	0.872	1.196	0.761	0.73	0.555	0.824	0.751	0.655	0.944	Cluster3	0.231131179334445
P47713	437	S	Cytosolic phospholipase A2 OS=Mus musculus OX=10090 GN=Pla2g4a PE=1 SV=1	Pla2g4a	0.999999	6.3478e-144	418.86	2	HIVSNDS(0.332)S(0.668)DS(1)DDEAQGPK	-0.12473	30	1.004	1.055	1.151	0.644	1.122	1.024	0.971	1.146	0.913	1.118	1.026	1.02	0.61	1.091	1.59	0.56	0.89	0.574	1.051	0.641	0.94	Cluster3	0.375704729569171
P58686	82	S	UPF0184 protein C9orf16 homolog OS=Mus musculus OX=10090 PE=3 SV=1	--	1	1.82708e-06	126.04	2	LEFQQQLGEAPGDAS(1)P	-1.2485	2	1.04	0.903	1.154	0.67	1.058	1.175	1.301	1.11	1.111	1.017	1.091	1.13	0.742	1.278	1.754	0.581	1.018	0.633	0.868	0.644	0.853	Cluster3	0.35638305692691
P62960	174	S	Y-box-binding protein 1 OS=Mus musculus OX=10090 GN=Ybx1 PE=1 SV=3	Ybx1	1	4.3045e-07	166.9	2	NEGS(1)ES(1)APEGQAQQR	-0.99978	5	0.948	1.218	0.946	0.604	1.244	1.041	0.855	0.998	0.837	1.312	0.76	1.098	0.496	0.777	1.724	0.638	1.1	0.486	1.285	0.637	0.979	Cluster3	0.319069029051105
P97868	1707	S	E3 ubiquitin-protein ligase RBBP6 OS=Mus musculus OX=10090 GN=Rbbp6 PE=1 SV=5	Rbbp6	0.763678	0.000176903	119.45	3	SHS(0.001)PS(0.764)GS(0.21)QT(0.026)R	0.090237	2	1.277	0.949	0.954	0.684	1.116	1.02	1.075	0.747	0.914	0.874	0.855	0.799	0.721	1.005	1.491	0.717	1.069	0.613	0.743	0.536	0.85	Cluster3	0.393903582876272
P98203	345	S	Armadillo repeat protein deleted in velo-cardio-facial syndrome homolog OS=Mus musculus OX=10090 GN=Arvcf PE=1 SV=2	Arvcf	0.99999	0.00077041	95.417	3	RS(1)PSVDSTR	0.18821	1	1.283	0.944	1.159	0.7	0.875	1.038	1.1	0.903	1.186	0.682	1.325	0.809	0.742	1.228	1.483	0.604	0.896	0.8	0.736	0.546	1.079	Cluster3	0.290012248389852
Q00PI9	226	S	Heterogeneous nuclear ribonucleoprotein U-like protein 2 OS=Mus musculus OX=10090 GN=Hnrnpul2 PE=1 SV=2	Hnrnpul2	0.752858	0.000172498	117.18	3	S(0.247)KS(0.753)PPPPEEEAK	-0.12249	1	0.923	0.878	1.095	0.648	1.179	1.277	1.454	1.186	1.083	1.277	0.929	1.384	0.738	1.247	1.971	0.592	1.166	0.55	0.951	0.702	0.745	Cluster3	0.304075473156889
Q3UHX2	176	S	28 kDa heat- and acid-stable phosphoprotein OS=Mus musculus OX=10090 GN=Pdap1 PE=1 SV=1	Pdap1	0.982754	0.0213913	58.37	3	MQS(0.983)LS(0.017)LNK	-0.63428	2	1.317	1.09	0.98	0.381	1.184	1.049	0.962	0.744	0.886	0.899	0.828	0.797	0.35	0.899	2.753	0.389	1.07	0.322	0.828	0.289	0.921	Cluster3	0.461119816337124
Q4FK66	193	S	Pre-mRNA-splicing factor 38A OS=Mus musculus OX=10090 GN=Prpf38a PE=1 SV=1	Prpf38a	1	8.67938e-53	307.82	3	VSALEEDMDDVES(1)S(1)EEEEEEDEKLER	0.31205	12	1.066	1.08	1.189	0.509	1.127	1.029	0.953	1.115	0.913	1.057	1.055	0.965	0.471	1.101	2.022	0.428	0.865	0.452	1.013	0.477	0.958	Cluster3	0.412521204816945
Q52KI8	490	S	Serine/arginine repetitive matrix protein 1 OS=Mus musculus OX=10090 GN=Srrm1 PE=1 SV=2	Srrm1	0.929218	9.7914e-11	205	3	QNQQS(0.929)S(0.061)S(0.01)DSGSSSTSEDERPK	-0.23174	1	1.13	0.863	0.911	0.673	1.341	1.082	1.254	0.806	0.807	1.187	0.679	0.958	0.78	1.056	1.608	0.739	1.188	0.502	0.764	0.596	0.644	Cluster3	0.375090151742073
Q52KI8	674	S	Serine/arginine repetitive matrix protein 1 OS=Mus musculus OX=10090 GN=Srrm1 PE=1 SV=2	Srrm1	0.995108	0.006453	72.2	3	RS(0.005)PS(0.995)LSSK	0.38424	3	1.477	0.954	1.062	0.782	0.927	0.797	0.835	0.719	0.86	0.628	1.146	0.54	0.82	1.113	1.019	0.736	0.75	0.844	0.646	0.529	1.029	Cluster3	0.26008022244433
B7ZNG4	666	S	Tastin OS=Mus musculus OX=10090 GN=Troap PE=2 SV=1	Troap	0.897969	0.00628785	66.965	3	FVPIGPVVPQDS(0.898)PS(0.102)	1.6494	1	0.924	1.312	0.998	0.584	1.116	1.065	0.812	1.08	0.954	1.208	0.894	1.153	0.445	0.761	1.824	0.585	1.067	0.523	1.42	0.632	1.176	Cluster3	0.289190766545392
Q60875	959	S	Rho guanine nucleotide exchange factor 2 OS=Mus musculus OX=10090 GN=Arhgef2 PE=1 SV=4	Arhgef2	1	3.34183e-10	190.72	2	LS(1)PPHS(1)PR	-1.8048	12	1.02	1.392	0.901	0.68	1.007	1	0.718	0.883	0.993	0.987	0.895	0.98	0.489	0.647	1.471	0.755	1.11	0.675	1.365	0.667	1.382	Cluster3	0.253608380554076
Q61033	183	S	Lamina-associated polypeptide 2, isoforms alpha/zeta OS=Mus musculus OX=10090 GN=Tmpo PE=1 SV=4	Tmpo	0.999997	5.97711e-42	284.48	2	QNGSNDSDRYS(1)DNDEGK	0.33144	12	1.088	1.137	1.072	0.635	1.079	0.989	0.87	0.985	0.917	0.992	0.994	0.909	0.558	0.943	1.557	0.592	0.923	0.589	1.045	0.584	1.054	Cluster3	0.403042564990608
Q64364	125	S	Tumor suppressor ARF OS=Mus musculus OX=10090 GN=Cdkn2a PE=1 SV=1	Cdkn2a	1	0.000476202	122.13	2	CLGS(1)PAAR	-0.62223	1	1.361	0.931	0.941	0.719	1.133	0.916	0.984	0.691	0.808	0.832	0.831	0.673	0.772	1.011	1.274	0.764	0.973	0.635	0.684	0.528	0.822	Cluster3	0.343942043538658
Q6PDM2	238	S	Serine/arginine-rich splicing factor 1 OS=Mus musculus OX=10090 GN=Srsf1 PE=1 SV=3	Srsf1	0.980784	0.0065097	81.799	3	GS(0.999)PRY(0.02)S(0.981)PR	-0.64867	7	0.935	0.946	1.058	0.613	1.311	1.136	1.201	1.132	0.867	1.402	0.807	1.215	0.648	1.118	1.853	0.579	1.074	0.468	1.012	0.656	0.722	Cluster3	0.363820797373604
Q6PDM2	2	S	Serine/arginine-rich splicing factor 1 OS=Mus musculus OX=10090 GN=Srsf1 PE=1 SV=3	Srsf1	1	0.00399124	91.093	2	S(1)GGGVIR	-0.035271	1	0.997	0.919	1.075	0.673	0.994	1.342	1.46	1.078	1.35	0.997	1.081	1.346	0.732	1.17	1.994	0.626	1.248	0.677	0.922	0.675	0.925	Cluster3	0.25578142414507
Q6TXD4	1374	S	Dynamin-binding protein OS=Mus musculus OX=10090 GN=Dnmbp PE=1 SV=2	Dnmbp	0.968738	1.24392e-66	330.17	4	CSHSDASVASHSSTESEHSGS(0.031)S(0.969)PGCHR	-0.71498	1	1.263	0.828	1.04	0.808	1.266	0.794	0.959	0.823	0.627	1.002	0.821	0.629	0.976	1.256	0.983	0.777	0.763	0.638	0.656	0.64	0.654	Cluster3	0.299963493546411
Q6Y7W8	276	S	GRB10-interacting GYF protein 2 OS=Mus musculus OX=10090 GN=Gigyf2 PE=1 SV=2	Gigyf2	0.795767	4.34059e-05	134.3	2	S(0.025)GS(0.796)GS(0.179)IDDDR	0.55743	1	0.987	1.478	0.883	0.764	0.888	1	0.677	0.895	1.126	0.9	0.994	1.013	0.517	0.597	1.309	0.865	1.133	0.86	1.497	0.774	1.664	Cluster3	0.197760802215547
Q80U28	928	S	MAP kinase-activating death domain protein OS=Mus musculus OX=10090 GN=Madd PE=1 SV=2	Madd	0.939861	0.0261365	51.979	3	REPS(0.94)S(0.06)PQGR	1.1064	1	1.265	0.809	1.055	0.621	1.03	1.219	1.507	0.834	1.183	0.814	1.024	0.964	0.768	1.304	1.963	0.589	1.155	0.603	0.64	0.491	0.785	Cluster3	0.320889209317808
Q811F1	411	S	Zinc finger and BTB domain-containing protein 41 OS=Mus musculus OX=10090 GN=Zbtb41 PE=2 SV=4	Zbtb41	1	0.000367831	98.531	4	KHS(1)NEVEFHR	-1.9999	1	1.405	0.877	1.035	1.003	0.948	0.733	0.836	0.737	0.773	0.675	1.092	0.522	1.144	1.18	0.731	0.969	0.708	1.058	0.624	0.714	0.925	Cluster3	0.21402247543158
Q8BJU0	303	S	Small glutamine-rich tetratricopeptide repeat-containing protein alpha OS=Mus musculus OX=10090 GN=Sgta PE=1 SV=2	Sgta	0.999215	0.000117813	139.34	3	S(0.999)RT(0.999)PS(0.891)AS(0.111)HEEQQE	-0.33209	6	1.161	0.979	1.013	0.568	1.109	1.17	1.195	0.873	1.055	0.955	0.913	1.008	0.58	1.035	2.06	0.561	1.155	0.512	0.843	0.489	0.883	Cluster3	0.434169511327677
Q8BTI8	1849	S	Serine/arginine repetitive matrix protein 2 OS=Mus musculus OX=10090 GN=Srrm2 PE=1 SV=3	Srrm2	0.922029	0.036996	48.44	3	S(0.813)RS(0.903)RT(0.358)S(0.922)PVS(0.004)R	0.43753	2	1.238	0.818	1.089	0.706	0.964	1.185	1.449	0.88	1.229	0.779	1.13	0.957	0.863	1.331	1.678	0.648	1.088	0.732	0.661	0.57	0.849	Cluster3	0.273415025573304
Q8BYJ6	577	S	TBC1 domain family member 4 OS=Mus musculus OX=10090 GN=Tbc1d4 PE=1 SV=2	Tbc1d4	0.960355	1.01227e-15	201.06	3	SLT(0.005)S(0.035)S(0.96)LENIFSR	-0.26037	2	0.881	0.945	0.756	0.684	1.383	1.351	1.43	0.858	0.977	1.57	0.547	1.533	0.724	0.8	1.975	0.905	1.787	0.495	1.073	0.776	0.683	Cluster3	0.244537839820925
Q8CCH7	476	S	Zinc finger protein ZFPM2 OS=Mus musculus OX=10090 GN=Zfpm2 PE=1 SV=2	Zfpm2	0.992111	0.0170998	74.301	2	S(0.001)EPS(0.007)S(0.992)PR	0.75439	2	1.234	1.045	0.849	0.68	1.094	1.099	1.052	0.688	1.005	0.887	0.776	0.891	0.651	0.812	1.616	0.801	1.294	0.622	0.847	0.551	0.955	Cluster4	0.338939544005713
Q8CEF9	3	S	Transmembrane protein 132C OS=Mus musculus OX=10090 GN=Tmem132c PE=2 SV=3	Tmem132c	1	0.0175405	58.981	2	RS(1)EGAAPR	-2.7004	1	1.44	1.003	0.707	0.846	0.883	1.12	1.117	0.491	1.268	0.613	0.801	0.778	0.843	0.705	1.324	1.197	1.584	0.958	0.697	0.588	1.136	Cluster4	0.488572466804863
Q91W92	184	S	Cdc42 effector protein 1 OS=Mus musculus OX=10090 GN=Cdc42ep1 PE=1 SV=1	Cdc42ep1	1	0.000135537	125.5	4	DRDRDPDHS(1)QDR	-0.37307	2	1.245	0.847	0.703	0.998	1.002	1.205	1.423	0.565	1.203	0.805	0.702	0.968	1.178	0.83	1.207	1.42	1.714	0.996	0.68	0.802	0.845	Cluster4	0.34034125300247
Q923D5	274	S	WW domain-binding protein 11 OS=Mus musculus OX=10090 GN=Wbp11 PE=1 SV=2	Wbp11	0.990604	3.95983e-30	256.79	4	HDDS(0.001)T(0.009)EDS(0.991)DT(0.999)DRS(0.001)DAESDGDEFGHR	-0.64182	13	1.368	1.183	0.837	0.732	0.863	1.016	0.859	0.612	1.177	0.631	0.97	0.743	0.619	0.708	1.388	0.875	1.214	0.848	0.865	0.535	1.371	Cluster4	0.388231655140403
Q99J21	10	S	Mucolipin-1 OS=Mus musculus OX=10090 GN=Mcoln1 PE=1 SV=1	Mcoln1	0.999806	0.00824154	72.643	3	RAS(1)ETER	0.1312	1	1.054	1.332	0.669	0.703	0.852	1.39	1.044	0.635	1.631	0.808	0.785	1.319	0.528	0.502	1.977	1.051	2.078	0.825	1.264	0.667	1.563	Cluster4	0.319215434275835
Q9D0M2	154	S	Cell division cycle-associated protein 7 OS=Mus musculus OX=10090 GN=Cdca7 PE=1 SV=1	Cdca7	1	0.0148549	60.436	3	HS(1)LPGHR	-0.86919	1	1.409	1.011	0.752	0.866	0.914	1.048	1.037	0.534	1.147	0.649	0.823	0.744	0.857	0.744	1.21	1.152	1.394	0.947	0.718	0.615	1.106	Cluster4	0.475237790780242
Q9QYR6	2591	S	Microtubule-associated protein 1A OS=Mus musculus OX=10090 GN=Map1a PE=1 SV=2	Map1a	1	0.0140224	60.434	3	AKPAS(1)PAR	-2.6859	1	1.433	1.047	0.745	0.797	0.931	1.046	0.999	0.52	1.124	0.65	0.8	0.73	0.761	0.712	1.312	1.07	1.404	0.856	0.731	0.556	1.125	Cluster4	0.508723606860785
Q9WU62	218	S	Inner centromere protein OS=Mus musculus OX=10090 GN=Incenp PE=1 SV=2	Incenp	1	1.30406e-05	133.41	4	LDSVTVNSLKAT(1)PQS(1)PK	0.18767	6	1.417	1.103	0.773	0.875	0.842	0.989	0.897	0.546	1.175	0.594	0.918	0.698	0.793	0.701	1.13	1.132	1.279	1.039	0.778	0.618	1.31	Cluster4	0.400758321452835
O08553	514	T	Dihydropyrimidinase-related protein 2 OS=Mus musculus OX=10090 GN=Dpysl2 PE=1 SV=2	Dpysl2	0.81977	0.00694982	73.666	3	T(0.18)VT(0.82)PASSAK	0.064072	1	1.244	0.825	0.776	0.808	1.128	1.218	1.476	0.624	1.08	0.907	0.688	0.979	0.979	0.941	1.507	1.041	1.57	0.716	0.663	0.65	0.731	Cluster4	0.352046952649065
Q62433	346	T	Protein NDRG1 OS=Mus musculus OX=10090 GN=Ndrg1 PE=1 SV=1	Ndrg1	0.978155	0.00299721	89.029	3	S(0.001)HT(0.978)S(0.021)EGPR	0.36118	2	1.283	1.266	0.732	0.721	0.794	1.204	0.951	0.571	1.516	0.619	0.922	0.938	0.57	0.578	1.67	0.985	1.645	0.908	0.987	0.562	1.594	Cluster4	0.394817791729111
Q7TPM1	823	T	Protein PRRC2B OS=Mus musculus OX=10090 GN=Prrc2b PE=1 SV=1	Prrc2b	0.994629	5.06235e-06	159.04	4	TTHASSDGPET(0.995)PS(0.005)KK	0.41691	1	1.34	1.054	0.784	0.769	1.082	0.971	0.921	0.585	0.897	0.807	0.725	0.725	0.73	0.744	1.263	0.981	1.239	0.711	0.787	0.574	0.974	Cluster4	0.406189728033828
Q80XH1	168	T	KxDL motif-containing protein 1 OS=Mus musculus OX=10090 GN=Kxd1 PE=1 SV=1	Kxd1	0.999998	0.00208276	115.83	2	QT(1)DDEEETHEE	0.70427	1	1.043	1.151	0.588	0.745	1.37	1.102	0.957	0.564	0.804	1.314	0.429	1.057	0.647	0.511	1.479	1.267	1.874	0.544	1.104	0.714	0.84	Cluster4	0.278261222684962
Q8BTI8	919	T	Serine/arginine repetitive matrix protein 2 OS=Mus musculus OX=10090 GN=Srrm2 PE=1 SV=3	Srrm2	0.997089	0.01089	70.808	3	VT(0.001)S(0.002)RT(0.997)PQR	0.5895	1	1.307	0.989	0.682	0.749	1.063	1.21	1.223	0.522	1.138	0.813	0.642	0.926	0.757	0.69	1.615	1.098	1.774	0.705	0.757	0.573	0.93	Cluster4	0.50121518966629
Q9CQS2	57	T	H/ACA ribonucleoprotein complex subunit 3 OS=Mus musculus OX=10090 GN=Nop10 PE=3 SV=1	Nop10	1	0.0463685	42.743	3	VLMT(1)QQPR	3.0606	1	1.247	1.099	0.684	0.812	1.037	1.121	1.02	0.549	1.081	0.832	0.66	0.899	0.739	0.622	1.381	1.187	1.639	0.783	0.881	0.651	1.06	Cluster4	0.47404480133993
P29699	138	S	Alpha-2-HS-glycoprotein OS=Mus musculus OX=10090 GN=Ahsg PE=1 SV=1	Ahsg	0.847002	6.38278e-06	138	3	VMHTQCHS(0.013)T(0.14)PDS(0.847)AEDVR	-3.8328	1	2.335	0.746	0.714	0.582	0.85	0.774	1.038	0.306	0.911	0.364	0.84	0.331	0.78	0.957	1.33	0.815	1.084	0.685	0.319	0.249	0.878	Cluster4	0.333078105155552
P39447	303	S	Tight junction protein ZO-1 OS=Mus musculus OX=10090 GN=Tjp1 PE=1 SV=2	Tjp1	1	0.0485584	41.876	3	S(1)HDRPPR	-0.40558	1	1.162	1.026	0.765	0.632	1.058	1.358	1.324	0.658	1.284	0.91	0.723	1.169	0.616	0.746	2.149	0.826	1.775	0.597	0.883	0.544	0.97	Cluster4	0.35399711382421
P52483	12	S	Ubiquitin-conjugating enzyme E2 E3 OS=Mus musculus OX=10090 GN=Ube2e3 PE=1 SV=2	Ube2e3	0.879654	2.0494e-32	271.92	2	SDDES(0.88)PS(0.101)T(0.015)S(0.002)SGS(0.001)SDADQR	1.1244	3	1.237	0.554	0.471	1.113	1.379	1.246	2.249	0.381	0.904	1.115	0.342	1.007	2.009	0.85	1.119	2.363	2.645	0.807	0.448	0.9	0.402	Cluster4	0.255749482395429
Q0P678	550	S	Zinc finger CCCH domain-containing protein 18 OS=Mus musculus OX=10090 GN=Zc3h18 PE=1 SV=1	Zc3h18	0.978552	0.000226548	117.07	2	TSASSASAS(0.001)NS(0.979)S(0.02)R	-0.36453	1	1.103	1.039	0.688	0.844	1.056	1.27	1.222	0.624	1.203	0.957	0.652	1.151	0.812	0.662	1.505	1.227	1.846	0.799	0.942	0.765	0.984	Cluster4	0.378188813346513
Q3TLH4	1215	S	Protein PRRC2C OS=Mus musculus OX=10090 GN=Prrc2c PE=1 SV=3	Prrc2c	0.998121	0.00894248	88.596	2	QREES(0.998)ET(0.002)R	-0.61016	1	1.108	1.005	0.613	0.659	1.285	1.33	1.323	0.553	1.035	1.16	0.477	1.2	0.656	0.61	2.018	1.075	2.17	0.513	0.907	0.595	0.782	Cluster4	0.325014364581837
Q3UH06	1583	S	Ras-responsive element-binding protein 1 OS=Mus musculus OX=10090 GN=Rreb1 PE=1 SV=2	Rreb1	1	7.01984e-05	125.28	5	HHGKDS(1)DKDER	0.25502	1	1.287	1.135	0.699	0.771	0.793	1.315	1.159	0.543	1.658	0.616	0.881	1.022	0.679	0.616	1.706	1.103	1.881	0.972	0.882	0.599	1.431	Cluster4	0.411315654206533
Q3UHI4	21	S	Protein TMED8 OS=Mus musculus OX=10090 GN=Tmed8 PE=2 SV=1	Tmed8	1	4.16137e-05	124.38	3	RGS(1)AGGVGDR	-0.8484	2	1.233	1.054	0.82	0.705	1.006	1.182	1.121	0.665	1.175	0.816	0.815	0.959	0.669	0.778	1.677	0.86	1.441	0.701	0.855	0.572	1.048	Cluster4	0.448475754633246
Q52KI8	781	S	Serine/arginine repetitive matrix protein 1 OS=Mus musculus OX=10090 GN=Srrm1 PE=1 SV=2	Srrm1	0.99475	2.2154e-05	141.44	2	AAS(1)PS(0.995)PQS(0.005)VR	0.29226	3	1.113	0.853	0.742	0.871	1.249	1.172	1.374	0.667	0.938	1.122	0.594	1.053	1.021	0.87	1.346	1.174	1.58	0.697	0.766	0.783	0.683	Cluster4	0.28711456385278
Q52KI8	209	S	Serine/arginine repetitive matrix protein 1 OS=Mus musculus OX=10090 GN=Srrm1 PE=1 SV=2	Srrm1	0.77978	0.00938158	61.444	3	T(0.78)KS(0.813)RS(0.78)PS(0.627)PAPEK	-0.13712	4	1.337	0.97	0.594	0.811	1.162	1.126	1.161	0.444	0.969	0.869	0.511	0.842	0.836	0.612	1.388	1.365	1.896	0.698	0.726	0.607	0.835	Cluster4	0.418693522428216
Q52KI8	429	S	Serine/arginine repetitive matrix protein 1 OS=Mus musculus OX=10090 GN=Srrm1 PE=1 SV=2	Srrm1	0.997042	0.0289927	61.691	3	S(0.305)RVS(0.698)VS(0.997)PGR	-0.23807	2	1.389	1.112	0.724	0.74	1.136	0.899	0.808	0.521	0.791	0.818	0.637	0.647	0.665	0.651	1.215	1.022	1.242	0.651	0.801	0.533	0.979	Cluster4	0.351676341207659
Q61062	601	S	Segment polarity protein dishevelled homolog DVL-3 OS=Mus musculus OX=10090 GN=Dvl3 PE=1 SV=2	Dvl3	0.765592	0.0034539	74.296	3	S(0.154)GGS(0.766)GS(0.081)ESDHTTR	0.12141	1	1.257	0.772	0.687	1.095	0.985	1.204	1.56	0.547	1.222	0.784	0.697	0.958	1.418	0.89	1.1	1.594	1.753	1.112	0.614	0.871	0.784	Cluster4	0.29017472274545
Q61084	131	S	Mitogen-activated protein kinase kinase kinase 3 OS=Mus musculus OX=10090 GN=Map3k3 PE=1 SV=1	Map3k3	0.83411	0.00213427	78.244	3	NHTS(0.006)S(0.15)S(0.834)PHS(0.006)GVS(0.004)R	0.6198	1	1.202	1.295	0.556	0.91	0.884	1.154	0.891	0.463	1.305	0.735	0.629	0.96	0.703	0.429	1.268	1.637	2.076	1.029	1.077	0.757	1.465	Cluster4	0.357097494052155
Q61656	498	S	Probable ATP-dependent RNA helicase DDX5 OS=Mus musculus OX=10090 GN=Ddx5 PE=1 SV=2	Ddx5	0.999928	0.0101772	71.614	3	DRYS(1)AGK	-0.38828	1	1.261	0.981	0.697	0.865	1.018	1.18	1.203	0.553	1.159	0.807	0.685	0.936	0.882	0.71	1.364	1.241	1.693	0.85	0.778	0.686	0.964	Cluster4	0.473546335549224
Q62417	250	S	Sorbin and SH3 domain-containing protein 1 OS=Mus musculus OX=10090 GN=Sorbs1 PE=1 SV=2	Sorbs1	0.999997	0.000192833	107.65	3	DDDSDVHS(1)PR	0.56301	2	1.238	1.067	0.716	0.874	0.856	1.248	1.17	0.578	1.458	0.691	0.836	1.008	0.819	0.671	1.428	1.221	1.743	1.021	0.862	0.706	1.246	Cluster4	0.41768505919418
Q66JV4	254	S	RNA-binding protein 12B-B OS=Mus musculus OX=10090 GN=Rbm12b2 PE=2 SV=2	Rbm12b2	0.978491	0.00326069	80.441	3	MRS(0.998)EEHS(0.978)PS(0.024)R	-0.17147	9	1.302	1.114	0.82	0.707	0.89	1.167	1.048	0.63	1.311	0.684	0.921	0.896	0.635	0.736	1.651	0.862	1.423	0.794	0.856	0.543	1.252	Cluster4	0.453648070743896
E9Q137	243	S	Testis-expressed protein 264 homolog OS=Mus musculus OX=10090 GN=Tex264 PE=2 SV=1	Tex264	0.999557	6.08866e-05	118.47	3	ETSATTLS(1)PGAGNR	0.68978	1	1.22	1.015	0.781	0.651	1.189	1.144	1.127	0.64	0.962	0.975	0.657	0.938	0.641	0.769	1.757	0.834	1.465	0.548	0.832	0.534	0.854	Cluster4	0.328342006994414
Q6NZJ6	708	S	Eukaryotic translation initiation factor 4 gamma 1 OS=Mus musculus OX=10090 GN=Eif4g1 PE=1 SV=1	Eif4g1	1	0.0372172	44.704	3	RS(1)QQGPR	-0.042469	2	1.247	1.055	0.738	0.772	1.094	1.094	1.037	0.592	1	0.877	0.675	0.877	0.732	0.7	1.417	1.046	1.482	0.706	0.846	0.619	0.964	Cluster4	0.462177472480959
Q6PHZ5	107	S	Putative RNA-binding protein 15B OS=Mus musculus OX=10090 GN=Rbm15b PE=1 SV=2	Rbm15b	0.999962	0.00708353	63.436	3	ASGDPGAGGAS(1)PR	-0.41307	1	1.301	0.935	0.82	0.727	0.976	1.242	1.328	0.63	1.273	0.75	0.84	0.955	0.778	0.877	1.708	0.887	1.515	0.745	0.719	0.559	0.958	Cluster4	0.454329525210848
E9Q5C9	116	S	Nucleolar and coiled-body phosphoprotein 1 OS=Mus musculus OX=10090 GN=Nolc1 PE=1 SV=1	Nolc1	1	0.00373195	72.681	4	RAS(1)VPQHAGK	0.99223	1	1.25	1.165	0.78	0.797	0.827	1.181	1.014	0.624	1.428	0.662	0.943	0.945	0.684	0.67	1.482	1.022	1.514	0.964	0.932	0.638	1.409	Cluster4	0.409478054362989
E9Q5C9	273	S	Nucleolar and coiled-body phosphoprotein 1 OS=Mus musculus OX=10090 GN=Nolc1 PE=1 SV=1	Nolc1	0.998707	0	533	2	S(0.999)S(0.001)SSEDS(0.777)S(0.222)S(0.001)EEEEGQR	-0.24446	4	1.461	1.091	0.829	0.827	0.793	0.999	0.916	0.567	1.26	0.543	1.045	0.684	0.758	0.76	1.208	0.998	1.205	1.043	0.747	0.566	1.376	Cluster4	0.367946372989539
Q76LS9	440	S	Ubiquitin carboxyl-terminal hydrolase MINDY-1 OS=Mus musculus OX=10090 GN=Mindy1 PE=1 SV=1	Mindy1	1	0.0276872	63.076	2	APS(1)PQGR	0.37993	1	1.301	0.985	0.763	0.75	1.018	1.183	1.201	0.586	1.162	0.782	0.75	0.909	0.761	0.775	1.577	0.983	1.55	0.737	0.757	0.576	0.968	Cluster4	0.530725504733438
Q7TPV4	1219	S	Myb-binding protein 1A OS=Mus musculus OX=10090 GN=Mybbp1a PE=1 SV=2	Mybbp1a	0.863615	0.00621214	69.451	3	DQPPS(0.864)T(0.136)GKK	-0.25922	1	1.194	0.961	0.669	0.811	1.062	1.303	1.356	0.56	1.227	0.889	0.63	1.091	0.844	0.696	1.607	1.212	1.948	0.764	0.805	0.679	0.905	Cluster4	0.416158021921138
Q7TSH4	176	S	Centriolar coiled-coil protein of 110 kDa OS=Mus musculus OX=10090 GN=Ccp110 PE=1 SV=1	Ccp110	0.995929	0.00692628	81.09	2	QCES(0.996)PES(0.004)R	-2.7252	1	1.112	1.023	0.699	0.845	1.011	1.308	1.279	0.629	1.294	0.909	0.691	1.176	0.826	0.683	1.548	1.209	1.871	0.836	0.92	0.76	1.012	Cluster4	0.381494984572721
Q80UW2	17	S	F-box only protein 2 OS=Mus musculus OX=10090 GN=Fbxo2 PE=1 SV=1	Fbxo2	0.966966	9.10037e-15	131.6	3	MDGDGDPES(0.002)VS(0.031)HPEEAS(0.967)PEEQPEEAGAEASAEEEQLR	-0.70733	2	1.006	1.012	0.65	0.844	1.339	1.148	1.134	0.646	0.857	1.331	0.485	1.141	0.834	0.642	1.36	1.298	1.766	0.63	1.006	0.839	0.756	Cluster4	0.264826764899232
E9Q784	64	S	Zinc finger CCCH domain-containing protein 13 OS=Mus musculus OX=10090 GN=Zc3h13 PE=1 SV=1	Zc3h13	1	0.001965	90.827	3	FIHGPS(1)PR	0.063658	1	1.543	0.84	0.908	1.066	0.948	0.696	0.829	0.588	0.734	0.614	0.958	0.451	1.269	1.081	0.653	1.174	0.767	1.124	0.544	0.691	0.886	Cluster4	0.23113157407044
E9Q784	334	S	Zinc finger CCCH domain-containing protein 13 OS=Mus musculus OX=10090 GN=Zc3h13 PE=1 SV=1	Zc3h13	0.892472	8.29856e-11	189.59	3	HHSS(0.092)S(0.892)S(0.015)QSGSSIQR	-0.27919	1	1.388	1.084	0.803	0.888	1.072	0.766	0.707	0.579	0.715	0.772	0.749	0.552	0.819	0.741	0.863	1.106	0.954	0.828	0.781	0.64	1.011	Cluster4	0.268967080702953
E9Q784	340	S	Zinc finger CCCH domain-containing protein 13 OS=Mus musculus OX=10090 GN=Zc3h13 PE=1 SV=1	Zc3h13	0.758799	3.38429e-05	140.89	3	HHSSSSQS(0.049)GS(0.192)S(0.759)IQR	0.82207	1	1.263	0.757	0.714	0.698	1.184	1.384	1.828	0.565	1.169	0.937	0.603	1.096	0.922	0.943	1.983	0.978	1.938	0.59	0.599	0.553	0.639	Cluster4	0.320502732143371
E9Q784	1343	S	Zinc finger CCCH domain-containing protein 13 OS=Mus musculus OX=10090 GN=Zc3h13 PE=1 SV=1	Zc3h13	0.913632	0.00628049	72.652	3	RS(0.914)S(0.086)PESDR	2.1169	1	1.427	1.237	0.773	0.755	0.708	1.099	0.888	0.542	1.552	0.496	1.092	0.77	0.61	0.625	1.456	0.977	1.422	1.066	0.867	0.529	1.747	Cluster4	0.352536678477335
E9Q784	1344	S	Zinc finger CCCH domain-containing protein 13 OS=Mus musculus OX=10090 GN=Zc3h13 PE=1 SV=1	Zc3h13	0.83768	0.0112885	64.82	2	RS(0.156)S(0.838)PES(0.006)DR	1.3829	2	1.337	1.078	0.729	0.854	1.045	0.957	0.888	0.545	0.916	0.782	0.698	0.716	0.792	0.676	1.121	1.171	1.313	0.817	0.806	0.639	1.032	Cluster4	0.41538982421053
Q8BGD9	422	S	Eukaryotic translation initiation factor 4B OS=Mus musculus OX=10090 GN=Eif4b PE=1 SV=1	Eif4b	0.992614	2.4011e-43	289.5	2	T(0.001)GS(0.993)ES(0.006)SQTGASATSGR	0.31163	2	1.311	1.004	0.865	0.766	0.85	1.204	1.199	0.66	1.416	0.648	1.018	0.918	0.763	0.862	1.572	0.886	1.392	0.901	0.766	0.584	1.181	Cluster4	0.392398867040882
Q8BIG4	344	S	F-box only protein 28 OS=Mus musculus OX=10090 GN=Fbxo28 PE=1 SV=1	Fbxo28	1	4.14118e-245	499.79	2	EVMESAVGTSSGSGQSEES(1)PR	0.17365	3	1.083	1.164	0.519	1.025	1.215	0.994	0.854	0.479	0.818	1.122	0.427	0.918	0.881	0.446	0.97	1.975	1.915	0.844	1.075	0.946	0.958	Cluster4	0.280135556158421
Q8BSY0	23	S	Aspartyl/asparaginyl beta-hydroxylase OS=Mus musculus OX=10090 GN=Asph PE=1 SV=1	Asph	0.883218	3.96945e-15	188.3	3	GGGGNSSSSGS(0.001)GS(0.08)GS(0.883)GS(0.035)GSPSTGSSGSSSSPGAR	0.23208	1	0.914	1.248	0.655	1.17	1.063	0.951	0.762	0.717	0.895	1.163	0.616	1.04	0.937	0.525	0.813	1.786	1.452	1.101	1.365	1.28	1.174	Cluster4	0.213922141180941
Q8BTI8	908	S	Serine/arginine repetitive matrix protein 2 OS=Mus musculus OX=10090 GN=Srrm2 PE=1 SV=3	Srrm2	0.921037	2.5165e-05	157.09	3	SHSS(0.003)S(0.053)S(0.921)S(0.037)PS(0.906)PS(0.081)R	0.18427	8	1.501	1.023	0.665	0.887	1.028	0.896	0.876	0.443	0.872	0.685	0.647	0.597	0.867	0.65	1.01	1.334	1.347	0.863	0.682	0.591	0.995	Cluster4	0.382623252965526
Q8BTI8	1720	S	Serine/arginine repetitive matrix protein 2 OS=Mus musculus OX=10090 GN=Srrm2 PE=1 SV=3	Srrm2	1	0.00529788	81.594	3	S(1)PS(1)PKPR	0.45835	9	1.409	1.091	0.843	0.753	0.974	0.931	0.853	0.598	0.956	0.691	0.866	0.661	0.69	0.773	1.236	0.893	1.104	0.773	0.774	0.534	1.12	Cluster4	0.372910846513364
Q8BZ47	559	S	Zinc finger protein 609 OS=Mus musculus OX=10090 GN=Znf609 PE=1 SV=2	Znf609	0.991144	0.0231953	67.838	2	GS(0.009)LS(0.991)PAR	-0.2997	1	1.329	1.102	0.907	0.68	0.938	1.043	0.946	0.682	1.112	0.706	0.967	0.785	0.617	0.823	1.534	0.75	1.15	0.725	0.829	0.512	1.175	Cluster4	0.343918610375053
Q8C180	365	S	Fibroblast growth factor receptor substrate 2 OS=Mus musculus OX=10090 GN=Frs2 PE=1 SV=3	Frs2	1	8.78634e-05	116.3	3	KLS(1)RDEDDNLGPK	1.4536	2	0.801	1.193	1.289	0.836	1.088	0.792	0.664	1.609	0.728	1.358	1.185	0.989	0.701	1.08	0.947	0.649	0.614	0.768	1.489	1.044	1.097	Cluster5	0.839938399463471
Q8C735	65	S	Protein lin-9 homolog OS=Mus musculus OX=10090 GN=Lin9 PE=1 SV=2	Lin9	1	0.000201035	131.45	2	LFS(1)DEDDR	-1.2402	1	0.57	2.051	1.192	0.503	1.1	0.584	0.285	2.091	0.531	1.93	1.084	1.025	0.245	0.581	1.161	0.422	0.49	0.457	3.598	0.882	1.865	Cluster5	0.432391087999348
Q8C8R3	3850	S	Ankyrin-2 OS=Mus musculus OX=10090 GN=Ank2 PE=1 SV=2	Ank2	0.859233	8.93715e-32	267.56	4	YVS(0.859)S(0.137)DGT(0.004)EKEEVTMQGMPQEPVNIEDGDNYSK	0.48168	1	0.714	1.255	1.301	0.792	1.101	0.837	0.667	1.822	0.76	1.542	1.182	1.172	0.631	1.037	1.057	0.609	0.643	0.719	1.758	1.109	1.14	Cluster5	0.684232530128573
Q8CFD4	450	S	Sorting nexin-8 OS=Mus musculus OX=10090 GN=Snx8 PE=1 SV=1	Snx8	1	0.0018849	90.731	2	S(1)PQEDGVCPH	-0.12996	1	0.97	1.253	1.183	0.815	1.083	0.695	0.555	1.22	0.642	1.116	1.092	0.716	0.65	0.944	0.853	0.689	0.587	0.753	1.292	0.84	1.157	Cluster5	0.408369670573025
Q8CGF1	920	S	Rho GTPase-activating protein 29 OS=Mus musculus OX=10090 GN=Arhgap29 PE=1 SV=1	Arhgap29	1	0.00369494	93.649	2	PLLS(1)PDER	0.017932	2	0.773	1.315	1.276	0.902	0.931	0.803	0.611	1.651	0.863	1.204	1.371	1.039	0.686	0.97	0.89	0.707	0.629	0.969	1.701	1.167	1.412	Cluster5	0.723248945793526
Q8CGI1	648	S	Protein FAM193A OS=Mus musculus OX=10090 GN=Fam193a PE=1 SV=2	Fam193a	1	5.9988e-05	104.03	4	RPPS(1)IGDVFHGLNK	-0.54104	1	0.729	1.427	1.14	0.882	1.08	0.742	0.52	1.564	0.687	1.481	1.056	1.018	0.618	0.799	0.841	0.774	0.651	0.817	1.957	1.21	1.321	Cluster5	0.64043447793141
Q8JZN5	478	S	Complex I assembly factor ACAD9, mitochondrial OS=Mus musculus OX=10090 GN=Acad9 PE=1 SV=2	Acad9	1	0.0046699	84.615	3	LRDS(1)LGR	0.28513	1	0.863	1.363	1.243	0.761	0.925	0.845	0.62	1.44	0.914	1.072	1.344	0.979	0.558	0.912	1.11	0.612	0.68	0.823	1.579	0.882	1.474	Cluster5	0.501272373838703
Q8K019	263	S	Bcl-2-associated transcription factor 1 OS=Mus musculus OX=10090 GN=Bclaf1 PE=1 SV=2	Bclaf1	0.831902	1.03972e-06	149.41	3	NTPS(0.002)QHS(0.166)HS(0.832)IQHS(1)PER	-0.52434	2	0.697	1.652	0.981	0.856	0.765	1.049	0.635	1.407	1.371	1.098	1.282	1.505	0.518	0.594	1.225	0.873	1.069	1.119	2.37	1.228	2.159	Cluster5	0.244483125641327
Q8K1N2	347	S	Pleckstrin homology-like domain family B member 2 OS=Mus musculus OX=10090 GN=Phldb2 PE=1 SV=2	Phldb2	0.990988	6.6717e-56	303.04	2	MLLASTS(0.009)S(0.991)DDFDR	-0.57464	3	0.761	1.396	1.37	0.734	1.01	0.728	0.521	1.8	0.721	1.327	1.356	0.957	0.526	0.981	0.992	0.536	0.531	0.727	1.834	0.965	1.382	Cluster5	0.818457751914355
Q8K382	536	S	DENN domain-containing protein 1A OS=Mus musculus OX=10090 GN=Dennd1a PE=1 SV=2	Dennd1a	0.909211	9.8017e-05	127.15	3	T(0.023)LKES(0.909)DS(0.068)AEGDETESPEQLVR	-1.4138	1	0.756	1.188	1.328	0.911	1.054	0.763	0.642	1.757	0.724	1.394	1.26	1.009	0.767	1.118	0.838	0.686	0.575	0.864	1.571	1.205	1.127	Cluster5	0.779744556695633
Q8K3A9	126	S	7SK snRNA methylphosphate capping enzyme OS=Mus musculus OX=10090 GN=Mepce PE=1 SV=2	Mepce	1	2.46377e-05	126.02	3	RNS(1)CNVGGGSGGSFK	1.6186	4	0.845	1.468	1.111	0.815	0.979	0.781	0.532	1.315	0.798	1.159	1.135	0.924	0.555	0.757	0.958	0.734	0.703	0.832	1.737	0.964	1.499	Cluster5	0.498467697305806
Q8R1A4	910	S	Dedicator of cytokinesis protein 7 OS=Mus musculus OX=10090 GN=Dock7 PE=1 SV=3	Dock7	0.999876	1.11994e-190	455.68	2	SLSNSNPDISGTPTS(1)PDDEVR	-1.7485	3	0.716	1.379	1.366	0.841	0.976	0.723	0.524	1.908	0.741	1.363	1.4	1.01	0.61	0.991	0.86	0.616	0.529	0.862	1.926	1.175	1.413	Cluster5	0.857403745347383
Q8VBT9	279	S	Tether containing UBX domain for GLUT4 OS=Mus musculus OX=10090 GN=Aspscr1 PE=1 SV=1	Aspscr1	0.932139	0.000226165	96.793	3	LGGPSASLRPLT(0.057)S(0.932)PS(0.01)ANS(0.001)SK	0.61489	2	0.857	1.25	1.256	0.797	1.099	0.742	0.594	1.466	0.675	1.282	1.143	0.866	0.638	1.005	0.931	0.635	0.591	0.725	1.459	0.93	1.137	Cluster5	0.65916978480255
Q99LI2	433	S	Chloride channel CLIC-like protein 1 OS=Mus musculus OX=10090 GN=Clcc1 PE=1 SV=1	Clcc1	0.999994	2.0967e-11	200.97	4	FHSGNKS(1)PEVLR	-0.046333	3	0.808	1.308	1.253	0.767	1.079	0.785	0.6	1.551	0.728	1.335	1.161	0.972	0.586	0.958	1.023	0.612	0.626	0.711	1.619	0.949	1.212	Cluster5	0.714289456738552
Q99PP7	1134	S	E3 ubiquitin-protein ligase TRIM33 OS=Mus musculus OX=10090 GN=Trim33 PE=1 SV=2	Trim33	1	2.10781e-05	146.47	3	S(1)DERPVHIK	0.72783	5	0.796	1.167	1.377	0.95	0.921	0.79	0.677	1.73	0.858	1.157	1.495	0.992	0.814	1.18	0.832	0.69	0.574	1.031	1.466	1.193	1.267	Cluster5	0.609269341373183
Q99PP7	659	S	E3 ubiquitin-protein ligase TRIM33 OS=Mus musculus OX=10090 GN=Trim33 PE=1 SV=2	Trim33	0.802258	2.63593e-25	233.66	4	QHSNPGHAGPFPVVSAHNPINPT(0.181)S(0.802)PT(0.006)T(0.009)AT(0.001)MANANR	0.1318	1	0.785	1.152	1.169	0.915	1.301	0.678	0.589	1.489	0.521	1.657	0.899	0.864	0.794	1.015	0.741	0.783	0.58	0.703	1.468	1.166	0.885	Cluster5	0.408455706827169
Q9D0F4	155	S	NF-kappa-B-activating protein OS=Mus musculus OX=10090 GN=Nkap PE=2 SV=1	Nkap	1	7.07486e-11	189.09	4	NPEPDS(1)DEHT(1)PVEDEEPKK	1.3084	3	1.009	0.8	1.723	0.801	0.899	0.768	0.96	1.708	0.854	0.891	1.917	0.761	1.001	2.154	0.959	0.465	0.446	0.891	0.793	0.794	0.89	Cluster5	0.228825576533633
Q9D219	104	S	B-cell CLL/lymphoma 9 protein OS=Mus musculus OX=10090 GN=Bcl9 PE=1 SV=3	Bcl9	0.96191	0.00201497	89.533	2	S(0.007)IS(0.962)ADS(0.031)FDQR	-0.42018	1	0.682	1.261	1.329	0.877	1.042	0.809	0.642	1.949	0.776	1.528	1.275	1.186	0.695	1.054	0.922	0.66	0.609	0.842	1.849	1.286	1.21	Cluster5	0.737604575392325
Q9D4J7	330	S	PHD finger protein 6 OS=Mus musculus OX=10090 GN=Phf6 PE=1 SV=1	Phf6	1	0.000116524	102.07	3	NHS(1)GNDERDEEDEER	0.53685	1	0.922	1.413	1.2	0.924	0.79	0.751	0.531	1.302	0.951	0.857	1.519	0.815	0.654	0.849	0.813	0.77	0.626	1.17	1.533	1.002	1.789	Cluster5	0.394499310305384
O35691	100	S	Pinin OS=Mus musculus OX=10090 GN=Pnn PE=1 SV=4	Pnn	1	4.07533e-23	250.72	3	RES(1)RQES(1)DPEDDDVK	0.15798	11	0.811	0.944	1.677	0.705	1.083	0.78	0.826	2.068	0.72	1.335	1.548	0.962	0.747	1.776	1.106	0.42	0.465	0.651	1.164	0.869	0.872	Cluster5	0.339793161959847
Q9DBR4	123	S	Amyloid-beta A4 precursor protein-binding family B member 2 OS=Mus musculus OX=10090 GN=Apbb2 PE=1 SV=2	Apbb2	1	1.84804e-05	153.06	3	NLS(1)PAAVINLTSEK	0.038986	1	0.681	1.295	1.447	0.94	0.994	0.644	0.497	2.125	0.648	1.46	1.456	0.946	0.726	1.117	0.685	0.65	0.445	0.946	1.902	1.38	1.303	Cluster5	0.705867005122017
Q9DBY0	296	S	Forkhead box protein P4 OS=Mus musculus OX=10090 GN=Foxp4 PE=1 SV=1	Foxp4	0.77503	2.07779e-31	267.77	4	RDS(0.775)S(0.175)S(0.05)HEETPSSHPLYGHGECK	0.078194	1	0.67	1.197	1.373	0.959	1.032	0.769	0.642	2.049	0.745	1.54	1.33	1.148	0.801	1.147	0.802	0.698	0.56	0.929	1.787	1.431	1.16	Cluster5	0.639489143460657
Q9DBY0	434	S	Forkhead box protein P4 OS=Mus musculus OX=10090 GN=Foxp4 PE=1 SV=1	Foxp4	0.994292	5.14821e-05	141.38	4	S(0.994)NDKFCS(0.006)PISSELAQNHEFYK	1.1515	1	0.793	1.277	1.257	0.834	1.072	0.767	0.601	1.585	0.715	1.352	1.173	0.967	0.653	0.984	0.92	0.663	0.61	0.778	1.61	1.052	1.191	Cluster5	0.923019808221009
Q9EQN3	271	S	TSC22 domain family protein 4 OS=Mus musculus OX=10090 GN=Tsc22d4 PE=1 SV=2	Tsc22d4	1	3.35e-06	148.7	3	S(1)PDPFGAAAAQSLSLAR	-1.2325	2	0.643	1.523	1.27	0.85	1.102	0.612	0.402	1.975	0.555	1.714	1.152	0.952	0.558	0.834	0.72	0.669	0.482	0.771	2.369	1.322	1.382	Cluster5	0.729460668543663
Q9JL61	184	S	DNA-binding protein Rfx5 OS=Mus musculus OX=10090 GN=Rfx5 PE=1 SV=2	Rfx5	0.992695	1.07647e-16	209.33	2	GS(0.007)ES(0.993)PEMGPEVSPAPR	-0.56666	2	0.715	1.065	1.258	1.241	0.915	0.805	0.756	1.759	0.88	1.28	1.375	1.126	1.165	1.181	0.649	0.986	0.64	1.356	1.49	1.736	1.164	Cluster5	0.347694627465081
Q9QWY8	858	S	Arf-GAP with SH3 domain, ANK repeat and PH domain-containing protein 1 OS=Mus musculus OX=10090 GN=Asap1 PE=1 SV=2	Asap1	1	1.79165e-06	126.84	3	T(0.078)LS(0.922)DPPS(1)PLPHGPPNK	-0.29628	7	0.768	1.214	1.233	0.904	1.129	0.752	0.619	1.605	0.666	1.47	1.092	0.979	0.745	1.016	0.832	0.733	0.61	0.801	1.581	1.177	1.075	Cluster5	0.7391733003941
O54916	708	S	RalBP1-associated Eps domain-containing protein 1 OS=Mus musculus OX=10090 GN=Reps1 PE=1 SV=2	Reps1	1	1.72732e-24	240.71	4	LKS(1)EDELRPDVDEHTQK	-0.41149	7	0.809	1.177	1.37	0.842	0.981	0.821	0.698	1.693	0.837	1.213	1.397	1.015	0.715	1.164	0.975	0.615	0.599	0.858	1.455	1.041	1.2	Cluster5	0.715845271371306
O54918	73	S	Bcl-2-like protein 11 OS=Mus musculus OX=10090 GN=Bcl2l11 PE=1 SV=1	Bcl2l11	1	0.00177414	104.2	2	S(1)PLFIFVR	-0.28234	2	0.669	1.723	1.242	0.734	0.969	0.663	0.385	1.857	0.684	1.448	1.282	0.991	0.426	0.721	0.903	0.591	0.534	0.757	2.575	1.097	1.778	Cluster5	0.659405662860512
O54918	100	S	Bcl-2-like protein 11 OS=Mus musculus OX=10090 GN=Bcl2l11 PE=1 SV=1	Bcl2l11	0.927202	9.12374e-05	130.57	3	SSSGYFSFDT(0.072)DRS(0.927)PAPMS(0.001)CDK	-1.5753	1	0.725	1.43	1.341	0.817	0.941	0.746	0.522	1.85	0.793	1.298	1.425	1.029	0.571	0.938	0.913	0.609	0.556	0.868	1.972	1.127	1.52	Cluster5	0.793243900891404
Q9Z131	379	S	SH3 domain-binding protein 5 OS=Mus musculus OX=10090 GN=Sh3bp5 PE=1 SV=3	Sh3bp5	0.998678	3.938e-55	295.09	2	SECS(0.045)GAS(0.956)S(0.999)PECEVER	-1.8342	4	0.805	1.146	1.304	0.833	1.116	0.796	0.695	1.62	0.713	1.386	1.168	0.989	0.727	1.138	0.956	0.639	0.61	0.746	1.424	1.035	1.027	Cluster5	0.692704758612408
O70475	474	T	UDP-glucose 6-dehydrogenase OS=Mus musculus OX=10090 GN=Ugdh PE=1 SV=1	Ugdh	0.999998	0.000533098	100.11	3	RIPYT(1)PGEIPK	-0.61663	2	0.827	1.236	1.209	0.789	1.133	0.806	0.652	1.462	0.711	1.37	1.067	0.975	0.638	0.978	1.022	0.653	0.667	0.696	1.495	0.954	1.091	Cluster5	0.527580254833151
Q3UYV9	21	T	Nuclear cap-binding protein subunit 1 OS=Mus musculus OX=10090 GN=Ncbp1 PE=1 SV=2	Ncbp1	0.864321	1.9202e-17	216.67	4	RKT(0.864)S(0.136)DANETEDHLESLICK	-0.66311	5	0.589	1.418	1.634	0.852	0.906	0.6	0.423	2.774	0.662	1.538	1.804	1.019	0.601	1.152	0.704	0.521	0.367	0.94	2.407	1.447	1.565	Cluster5	0.737670812497842
Q6A0A9	653	T	Constitutive coactivator of PPAR-gamma-like protein 1 OS=Mus musculus OX=10090 GN=FAM120A PE=1 SV=2	FAM120A	0.939398	4.77641e-05	140.89	3	S(0.061)PQT(0.939)PELVEALAFR	-0.52822	1	1.001	0.843	1.18	1.168	1.135	0.674	0.8	1.179	0.594	1.134	1.04	0.673	1.386	1.4	0.577	0.99	0.571	1.029	0.842	1.167	0.743	Cluster5	0.229458134300048
Q6AW69	303	T	Cingulin-like protein 1 OS=Mus musculus OX=10090 GN=Cgnl1 PE=1 SV=2	Cgnl1	0.987121	4.20402e-54	295.09	2	SSSSST(0.012)T(0.987)PTSATSLYK	0.26234	3	0.739	1.313	1.351	0.853	1.091	0.652	0.497	1.828	0.598	1.476	1.238	0.882	0.65	1.029	0.764	0.631	0.483	0.782	1.777	1.154	1.203	Cluster5	0.812126779757854
O70496	9	S	H(+)/Cl(-) exchange transporter 7 OS=Mus musculus OX=10090 GN=Clcn7 PE=1 SV=1	Clcn7	0.994283	0.0091913	70.363	3	KVS(0.994)WS(0.006)GR	0.64701	1	0.64	1.347	1.298	0.883	1.171	0.66	0.49	2.028	0.564	1.83	1.108	1.031	0.656	0.964	0.747	0.68	0.508	0.754	2.105	1.38	1.15	Cluster5	0.697472554112099
Q8BQZ4	724	T	Ral GTPase-activating protein subunit beta OS=Mus musculus OX=10090 GN=Ralgapb PE=1 SV=2	Ralgapb	0.996903	4.72879e-08	139.75	3	TNSGISSASGGSTEPT(0.003)T(0.997)PDSERPAQALLR	0.031341	1	0.912	1.079	1.379	0.983	1.001	0.646	0.599	1.512	0.645	1.098	1.378	0.708	0.911	1.278	0.657	0.713	0.468	0.982	1.183	1.078	1.078	Cluster5	0.438897716272511
Q9QY06	1317	T	Unconventional myosin-IXb OS=Mus musculus OX=10090 GN=Myo9b PE=1 SV=2	Myo9b	0.976045	0.00246589	115.12	2	ATGAALT(0.976)PT(0.024)EER	-1.3501	2	0.835	1.188	1.303	0.744	1.123	0.808	0.68	1.56	0.72	1.345	1.16	0.968	0.626	1.097	1.086	0.571	0.62	0.663	1.423	0.891	1.058	Cluster5	0.462926017136008
Q9WVS8	723	T	Mitogen-activated protein kinase 7 OS=Mus musculus OX=10090 GN=Mapk7 PE=1 SV=1	Mapk7	0.999963	5.10239e-05	104.18	3	SQVEDPLPPVFS(1)GT(1)PK	0.62429	2	0.75	1.279	1.359	0.841	1.035	0.736	0.575	1.812	0.711	1.38	1.313	0.981	0.658	1.063	0.875	0.619	0.542	0.813	1.705	1.121	1.236	Cluster5	0.908197013947133
O88738	483	S	Baculoviral IAP repeat-containing protein 6 OS=Mus musculus OX=10090 GN=Birc6 PE=1 SV=2	Birc6	1	0	538.94	2	LEGDSDDLLEDS(1)DSEEHSR	-0.044192	9	1.134	1.181	1.275	1.1	1.234	0.077	0.065	1.124	0.062	1.088	1.033	0.068	0.931	1.08	0.07	0.863	0.06	0.891	1.041	0.97	0.957	Cluster5	0.271355069824529
O88746	462	S	Target of Myb protein 1 OS=Mus musculus OX=10090 GN=Tom1 PE=1 SV=1	Tom1	0.999998	1.1557e-05	162.21	4	LPNLAS(1)PSAEGPPRPS(0.921)PGT(0.079)APR	0.27897	4	0.801	1.182	1.328	0.817	1.034	0.837	0.708	1.658	0.809	1.291	1.284	1.045	0.691	1.124	1.024	0.615	0.63	0.79	1.476	1.02	1.143	Cluster5	0.743746618662526
O88796	251	S	Ribonuclease P protein subunit p30 OS=Mus musculus OX=10090 GN=Rpp30 PE=1 SV=1	Rpp30	0.999999	1.84834e-08	172.24	3	KPRPS(1)EADDESLPVCK	-0.03786	2	0.838	1.234	1.245	0.777	1.104	0.803	0.651	1.486	0.727	1.317	1.128	0.958	0.63	1.009	1.033	0.624	0.645	0.704	1.473	0.927	1.118	Cluster5	0.591671539377715
P05627	63	S	Transcription factor AP-1 OS=Mus musculus OX=10090 GN=Jun PE=1 SV=3	Jun	0.947003	0.000730201	82.865	3	NSDLLT(0.053)S(0.947)PDVGLLK	0.35896	1	0.55	1.659	1.662	0.642	0.992	0.495	0.298	3.022	0.499	1.804	1.675	0.9	0.387	1.002	0.771	0.386	0.298	0.647	3.016	1.167	1.672	Cluster5	0.920126716041078
P33174	802	S	Chromosome-associated kinesin KIF4 OS=Mus musculus OX=10090 GN=Kif4 PE=1 SV=3	Kif4	0.982798	5.12407e-55	301	3	T(0.017)FS(0.983)YDEIHGQDSGAEDSIAK	0.067164	1	0.547	1.708	1.455	0.6	1.057	0.634	0.371	2.66	0.6	1.932	1.377	1.159	0.351	0.852	1.057	0.412	0.436	0.568	3.122	1.097	1.616	Cluster5	0.768441886691616
P54726	92	S	UV excision repair protein RAD23 homolog A OS=Mus musculus OX=10090 GN=Rad23a PE=1 SV=2	Rad23a	0.987806	6.99898e-16	151.89	4	AGQGIPAPPEAS(0.988)PT(0.012)AVPEPSTPFPPVLASGMSHPPPTSR	0.082225	1	0.853	1.047	1.428	0.807	1.091	0.774	0.739	1.674	0.709	1.279	1.309	0.907	0.771	1.364	0.959	0.565	0.542	0.74	1.227	0.946	0.96	Cluster5	0.468949981873229
P70399	1632	S	TP53-binding protein 1 OS=Mus musculus OX=10090 GN=Tp53bp1 PE=1 SV=3	Tp53bp1	0.982897	2.61578e-22	238.93	2	SNIS(0.001)S(0.983)PVT(0.016)PTAASSSSTTPTR	0.17483	2	1.112	1.136	1.251	0.908	1.247	0.345	0.304	1.125	0.277	1.121	1.003	0.31	0.799	1.101	0.38	0.726	0.276	0.728	1.022	0.817	0.911	Cluster5	0.281082846175023
P70459	21	S	ETS domain-containing transcription factor ERF OS=Mus musculus OX=10090 GN=Erf PE=1 SV=1	Erf	0.905408	2.21769e-15	221.89	3	TPADTGFAFPDWAYKPES(0.094)S(0.905)PGSR	-0.12879	2	0.732	1.167	1.338	0.955	1.081	0.727	0.623	1.828	0.673	1.477	1.238	0.993	0.818	1.147	0.761	0.714	0.543	0.883	1.594	1.305	1.08	Cluster5	0.66697667297309
P81122	385	S	Insulin receptor substrate 2 OS=Mus musculus OX=10090 GN=Irs2 PE=1 SV=2	Irs2	0.999888	2.54132e-15	177.3	3	PMSVAGS(1)PLS(1)PGPVR	-0.55632	5	1.009	1.063	1.375	0.751	1.056	0.747	0.703	1.363	0.707	1.047	1.302	0.74	0.706	1.294	0.995	0.546	0.543	0.711	1.054	0.744	1.007	Cluster5	0.317529940529761
P98078	227	S	Disabled homolog 2 OS=Mus musculus OX=10090 GN=Dab2 PE=1 SV=2	Dab2	0.972844	4.20246e-06	155.15	4	LGVDQMDLFGDMSTPPDLNS(0.973)PT(0.026)ES(0.001)K	0.088919	5	0.758	1.24	1.321	0.824	1.036	0.822	0.663	1.743	0.793	1.367	1.275	1.084	0.665	1.065	0.998	0.624	0.622	0.795	1.636	1.087	1.197	Cluster5	0.833504108516724
Q04863	552	S	Transcription factor RelB OS=Mus musculus OX=10090 GN=Relb PE=1 SV=2	Relb	1	1.24698e-05	118.31	3	EAAFGGGLLS(1)PGPEAT	0.47706	1	0.706	1.321	1.084	0.784	0.93	1.176	0.89	1.535	1.265	1.317	1.166	1.666	0.593	0.821	1.5	0.723	1.085	0.843	1.871	1.11	1.42	Cluster5	0.22152679933884
Q3TLD5	439	S	Unconventional prefoldin RPB5 interactor OS=Mus musculus OX=10090 GN=Uri1 PE=1 SV=2	Uri1	0.750232	4.06626e-82	350.04	3	S(0.122)T(0.122)S(0.75)S(0.005)EEAVATEAGGSSLDELQENHPK	-0.57541	1	0.719	1.338	1.162	0.794	1.252	0.735	0.549	1.616	0.587	1.741	0.928	1.022	0.593	0.868	0.926	0.683	0.633	0.634	1.861	1.104	1.069	Cluster5	0.453884338888857
Q3TN34	832	S	MICAL-like protein 2 OS=Mus musculus OX=10090 GN=Micall2 PE=1 SV=1	Micall2	0.997228	2.47066e-85	346.44	2	SAVLDSGLAPPGEAVT(0.003)S(0.997)PVR	0.40119	1	0.875	1.482	1.183	0.784	1.027	0.649	0.438	1.352	0.632	1.174	1.152	0.742	0.529	0.798	0.828	0.663	0.549	0.763	1.694	0.896	1.443	Cluster5	0.513342514224844
Q80WC3	2681	S	Trinucleotide repeat-containing gene 18 protein OS=Mus musculus OX=10090 GN=Tnrc18 PE=1 SV=2	Tnrc18	1	0.00287381	79.82	3	LPS(1)VENRPK	0.71404	1	0.732	1.521	1.224	0.739	1.035	0.749	0.492	1.672	0.724	1.414	1.183	1.023	0.486	0.805	1.014	0.604	0.612	0.714	2.078	1.01	1.47	Cluster5	0.657035621737468
B2RRD7	461	S	Peregrin OS=Mus musculus OX=10090 GN=Brpf1 PE=1 SV=1	Brpf1	1	2.24102e-22	238.72	3	RLPALS(1)HS(1)EGEEEEDEEEDEGK	0.25751	3	0.652	1.018	1.054	1.373	0.979	0.924	0.908	1.617	0.944	1.502	1.077	1.417	1.349	1.035	0.673	1.303	0.877	1.402	1.561	2.106	1.04	Cluster5	0.236900043296261
Q3UMG5	581	S	Leucine-rich repeat and calponin homology domain-containing protein 2 OS=Mus musculus OX=10090 GN=Lrch2 PE=2 SV=2	Lrch2	0.922114	1.4674e-83	357.05	4	KNS(0.922)S(0.078)GNENEEQESDNAHMSAQSPVSSEEYDR	-0.083659	2	0.7	1.33	1.347	0.854	1.006	0.763	0.574	1.924	0.758	1.437	1.339	1.09	0.642	1.013	0.893	0.634	0.566	0.849	1.9	1.22	1.322	Cluster5	0.845108814651298
Q3UMG5	529	S	Leucine-rich repeat and calponin homology domain-containing protein 2 OS=Mus musculus OX=10090 GN=Lrch2 PE=2 SV=2	Lrch2	0.985814	1.41011e-05	159.13	3	SVPADEGNS(0.014)PLS(0.986)PLAWQPLENQK	-0.054389	1	0.79	1.353	1.143	0.808	1.109	0.797	0.589	1.447	0.719	1.404	1.031	1.009	0.597	0.845	0.986	0.707	0.697	0.729	1.713	1.023	1.22	Cluster5	0.572674361870518
Q3UYV9	7	S	Nuclear cap-binding protein subunit 1 OS=Mus musculus OX=10090 GN=Ncbp1 PE=1 SV=2	Ncbp1	1	3.77781e-07	173.37	4	RHS(1)YENDGGQPHK	-1.3174	33	0.697	1.54	1.401	0.756	0.937	0.669	0.434	2.01	0.714	1.344	1.495	0.96	0.491	0.91	0.885	0.54	0.478	0.807	2.209	1.085	1.644	Cluster5	0.810698171630899
Q3UYV9	22	S	Nuclear cap-binding protein subunit 1 OS=Mus musculus OX=10090 GN=Ncbp1 PE=1 SV=2	Ncbp1	0.820884	8.16593e-25	241.84	3	KT(0.179)S(0.821)DANETEDHLESLICK	-1.3915	5	0.533	1.49	1.725	0.82	0.879	0.553	0.371	3.236	0.629	1.649	1.962	1.038	0.55	1.158	0.674	0.475	0.321	0.933	2.795	1.538	1.695	Cluster5	0.739513363018554
Q4VAC9	1158	S	Pleckstrin homology domain-containing family G member 3 OS=Mus musculus OX=10090 GN=Plekhg3 PE=1 SV=2	Plekhg3	0.999633	2.3688e-24	239.13	2	SPLS(1)PFDTETFNWPDVR	-0.32672	3	0.774	1.401	1.26	0.786	1.031	0.748	0.534	1.628	0.726	1.332	1.222	0.966	0.561	0.899	0.952	0.624	0.594	0.762	1.81	1.016	1.359	Cluster5	0.821617118454765
Q5DTX6	848	S	Junctional protein associated with coronary artery disease OS=Mus musculus OX=10090 GN=Jcad PE=1 SV=2	Jcad	0.999867	2.75587e-99	375.26	3	ELQEEEES(0.003)HGGS(0.997)GS(1)EDS(1)EAEQPEDCADSR	-0.092114	6	0.434	1.188	1.267	1.119	1.093	0.899	0.757	2.919	0.823	2.518	1.159	2.071	0.942	1.066	0.803	0.883	0.71	1.024	2.737	2.578	1.087	Cluster5	0.334432389996171
Q5DU09	215	S	Zinc finger protein 652 OS=Mus musculus OX=10090 GN=Znf652 PE=1 SV=2	Znf652	1	0.0143609	57.836	4	RKS(1)AELPK	0.46558	1	0.706	1.212	1.265	0.916	1.006	0.895	0.738	1.792	0.89	1.425	1.257	1.268	0.756	1.044	0.977	0.724	0.708	0.911	1.717	1.297	1.205	Cluster5	0.589511848512423
Q5XJE5	38	S	RNA polymerase-associated protein LEO1 OS=Mus musculus OX=10090 GN=Leo1 PE=1 SV=2	Leo1	0.977401	4.04767e-12	204.75	3	DSESESDSDSDQDNGAS(0.023)GS(0.977)NASGSESDQDDR	-2.4148	2	1.092	1.251	1.498	0.997	0.472	0.691	0.552	1.372	1.464	0.432	3.174	0.633	0.797	1.197	0.693	0.666	0.461	2.112	1.146	0.913	2.65	Cluster5	0.216442801043001
Q60949	782	S	TBC1 domain family member 1 OS=Mus musculus OX=10090 GN=Tbc1d1 PE=1 SV=3	Tbc1d1	1	1.79964e-53	310.75	4	YEDYSELGELPPRS(1)PLEPVCEDGPFGPVQEEK	0.69281	4	0.744	1.206	1.28	0.968	1.011	0.791	0.656	1.72	0.782	1.359	1.266	1.063	0.803	1.061	0.817	0.756	0.618	0.957	1.621	1.301	1.193	Cluster5	0.699450196186043
Q61165	707	S	Sodium/hydrogen exchanger 1 OS=Mus musculus OX=10090 GN=Slc9a1 PE=1 SV=1	Slc9a1	0.999993	0.000109951	138.02	2	IGS(1)DPLAYEPK	1.4477	2	0.746	1.537	1.334	0.709	1.001	0.674	0.439	1.788	0.673	1.342	1.333	0.903	0.461	0.868	0.951	0.531	0.505	0.708	2.06	0.95	1.535	Cluster5	0.747828378985711
Q61191	6	S	Host cell factor 1 OS=Mus musculus OX=10090 GN=Hcfc1 PE=1 SV=2	Hcfc1	0.999956	6.90134e-43	134.24	2	ASAVS(1)PANLPAVLLQPR	1.4141	3	0.826	0.998	1.331	1.151	1.051	0.644	0.645	1.611	0.613	1.272	1.266	0.78	1.153	1.334	0.56	0.865	0.484	1.095	1.208	1.393	0.95	Cluster5	0.372596355331155
Q69Z38	569	S	Inactive tyrosine-protein kinase PEAK1 OS=Mus musculus OX=10090 GN=Peak1 PE=1 SV=4	Peak1	0.960913	5.38706e-32	252.68	2	SAPT(0.023)S(0.961)PT(0.016)ATNISSK	-0.167	2	0.828	1.267	1.258	0.803	1.08	0.764	0.603	1.519	0.707	1.304	1.165	0.923	0.634	0.993	0.951	0.638	0.607	0.744	1.53	0.97	1.173	Cluster5	0.802665473166103
Q69ZR2	1389	S	E3 ubiquitin-protein ligase HECTD1 OS=Mus musculus OX=10090 GN=Hectd1 PE=1 SV=2	Hectd1	0.942285	2.68666e-53	294.72	3	KGS(0.942)S(0.045)S(0.01)S(0.002)VCSVASSSDISLASTK	-0.45738	1	0.723	1.505	1.379	0.694	1.039	0.66	0.439	1.907	0.635	1.437	1.327	0.913	0.461	0.916	0.951	0.503	0.479	0.668	2.082	0.96	1.449	Cluster5	0.812827100742117
Q6A000	554	S	Protein moonraker OS=Mus musculus OX=10090 GN=Kiaa0753 PE=1 SV=2	Kiaa0753	0.950437	0.00239577	76.713	3	APWIPPNPT(0.047)S(0.95)PPAS(0.002)PK	-1.576	2	0.637	1.179	1.022	1.07	1.108	0.984	0.835	1.604	0.888	1.739	0.922	1.545	0.908	0.867	0.92	1.047	0.963	0.966	1.851	1.68	1.064	Cluster5	0.286087037193947
Q6NVE8	50	S	WD repeat-containing protein 44 OS=Mus musculus OX=10090 GN=Wdr44 PE=1 SV=1	Wdr44	1	1.28009e-217	480.9	2	EAENTANQAGNES(1)PVQELR	-0.24715	4	0.343	1.116	1.259	1.047	1.198	1.037	0.929	3.671	0.866	3.493	1.051	3.023	0.938	1.128	0.99	0.832	0.824	0.874	3.254	3.052	0.932	Cluster5	0.272511162490535
Q6PAM0	107	S	5'-AMP-activated protein kinase subunit beta-2 OS=Mus musculus OX=10090 GN=Prkab2 PE=1 SV=1	Prkab2	1	1.83917e-05	140.41	4	S(1)HNDFVAILDLPEGEHQYK	0.80458	2	0.753	1.202	1.283	0.85	1.082	0.831	0.691	1.704	0.768	1.437	1.186	1.104	0.707	1.067	0.978	0.663	0.648	0.786	1.596	1.129	1.111	Cluster5	0.785296617501874
Q6PCL9	711	S	Poly(A) polymerase gamma OS=Mus musculus OX=10090 GN=Papolg PE=1 SV=1	Papolg	0.999395	0.00021098	95.366	4	RLPS(0.999)KELPDSSSPVPANNIR	0.66574	2	0.885	1.332	1.268	0.764	1.001	0.75	0.563	1.433	0.749	1.131	1.267	0.847	0.574	0.952	0.982	0.603	0.591	0.763	1.505	0.863	1.331	Cluster5	0.594282883491634
Q6PFR5	237	S	Transformer-2 protein homolog alpha OS=Mus musculus OX=10090 GN=Tra2a PE=1 SV=1	Tra2a	0.999473	0.0411245	47.302	3	RRDS(0.999)YYDR	-1.1794	1	0.833	0.811	2.215	0.771	0.658	0.712	0.878	2.659	1.082	0.79	3.366	0.855	0.951	2.731	0.923	0.348	0.321	1.172	0.974	0.926	1.233	Cluster5	0.264270138137546
Q6PIX5	391	S	Inactive rhomboid protein 1 OS=Mus musculus OX=10090 GN=Rhbdf1 PE=1 SV=2	Rhbdf1	0.999995	0.00256247	99.013	3	RIDS(1)YVK	0.085895	1	0.778	1.321	1.266	0.792	1.012	0.831	0.629	1.627	0.821	1.301	1.251	1.068	0.6	0.958	1.049	0.626	0.656	0.783	1.698	1.018	1.305	Cluster5	0.762449719162511
Q6Y685	376	S	Transforming acidic coiled-coil-containing protein 1 OS=Mus musculus OX=10090 GN=Tacc1 PE=1 SV=1	Tacc1	1	2.22344e-22	238.36	4	KDGVSKPVGVEQPSDPTVQDALLDQMS(1)PK	-0.39391	6	0.753	1.336	1.324	0.778	1.063	0.746	0.558	1.758	0.702	1.412	1.246	0.991	0.582	0.991	0.959	0.588	0.563	0.732	1.774	1.033	1.257	Cluster5	0.912110057697513
Q80TM9	543	S	Nischarin OS=Mus musculus OX=10090 GN=Nisch PE=1 SV=2	Nisch	0.999603	2.0274e-143	410.42	3	ACS(1)DS(0.999)LES(0.001)IPAGQVASDDLR	0.22348	3	0.64	1.27	1.358	0.905	1.173	0.655	0.516	2.122	0.558	1.833	1.158	1.023	0.713	1.069	0.724	0.666	0.482	0.772	1.984	1.414	1.083	Cluster5	0.671911986048579
E9Q6J5	236	S	Biorientation of chromosomes in cell division protein 1-like 1 OS=Mus musculus OX=10090 GN=Bod1l PE=1 SV=1	Bod1l	0.921709	0.0160312	59.339	3	KLS(0.922)S(0.069)QPS(0.007)T(0.002)DVSTDKER	-0.73055	1	0.974	1.115	1.344	0.855	0.978	0.733	0.657	1.38	0.749	1.004	1.374	0.753	0.767	1.205	0.857	0.636	0.545	0.874	1.145	0.878	1.14	Cluster5	0.446708231728917
E9Q6J5	632	S	Biorientation of chromosomes in cell division protein 1-like 1 OS=Mus musculus OX=10090 GN=Bod1l PE=1 SV=1	Bod1l	0.977294	2.70544e-05	152.13	3	RLS(0.977)ES(0.023)LHSADENK	-0.30929	2	0.778	1.396	1.113	0.808	1.066	0.84	0.602	1.431	0.788	1.37	1.044	1.08	0.579	0.797	1.04	0.726	0.755	0.758	1.794	1.039	1.31	Cluster5	0.507711068786892
Q80U72	1284	S	Protein scribble homolog OS=Mus musculus OX=10090 GN=Scrib PE=1 SV=2	Scrib	0.957144	0.00454229	68.042	4	T(0.011)T(0.011)EAPCS(0.957)PGS(0.02)QQPPS(0.001)PDELPANVK	1.6504	1	0.814	1.247	1.28	0.762	1.004	0.893	0.716	1.572	0.889	1.233	1.275	1.097	0.611	1.026	1.172	0.595	0.698	0.759	1.532	0.936	1.242	Cluster5	0.536479210790501
Q80V62	10	S	Fanconi anemia group D2 protein homolog OS=Mus musculus OX=10090 GN=Fancd2 PE=1 SV=2	Fancd2	0.999999	3.45664e-12	197.4	4	RLDS(1)EDKENLTEDASK	0.48626	1	0.771	1.236	1.288	0.789	1.078	0.839	0.679	1.671	0.778	1.398	1.195	1.088	0.638	1.042	1.063	0.613	0.651	0.732	1.603	1.023	1.147	Cluster5	0.719864451300144
Q8BHL3	693	S	TBC1 domain family member 10B OS=Mus musculus OX=10090 GN=Tbc1d10b PE=1 SV=2	Tbc1d10b	0.99494	5.13389e-14	185.97	4	ASAGPVPGAVVIAEGLHPS(0.001)LPS(0.995)PT(0.004)GNSTPLGTSK	1.28	1	0.791	1.043	1.355	0.913	1.127	0.771	0.739	1.713	0.684	1.425	1.202	0.975	0.875	1.299	0.844	0.674	0.569	0.81	1.319	1.154	0.925	Cluster5	0.524891385116123
F7BJB9	563	S	MORC family CW-type zinc finger protein 3 OS=Mus musculus OX=10090 GN=Morc3 PE=1 SV=1	Morc3	1	0.000100053	117.29	3	RLS(1)NPPVENSSYK	1.0049	3	0.863	1.291	1.259	0.813	1.01	0.764	0.592	1.459	0.756	1.17	1.247	0.885	0.63	0.975	0.94	0.646	0.607	0.805	1.496	0.942	1.278	Cluster5	0.746035659913041
Q8BUH8	12	S	Sentrin-specific protease 7 OS=Mus musculus OX=10090 GN=Senp7 PE=1 SV=1	Senp7	0.867461	6.51754e-05	127.18	3	RAS(0.867)S(0.133)EIVTEGK	-0.25507	2	0.749	1.402	1.295	0.838	1.038	0.678	0.484	1.729	0.653	1.386	1.248	0.905	0.598	0.924	0.809	0.647	0.524	0.807	1.872	1.119	1.351	Cluster5	0.845227045237839
Q8BZ32	524	S	Putative Polycomb group protein ASXL2 OS=Mus musculus OX=10090 GN=Asxl2 PE=1 SV=1	Asxl2	0.827138	4.2539e-11	189.11	3	KS(0.156)S(0.827)LT(0.017)DEEATSSWEK	0.47711	1	0.8	1.254	1.272	0.851	1.047	0.776	0.619	1.59	0.741	1.309	1.215	0.97	0.679	1.014	0.912	0.669	0.61	0.813	1.568	1.064	1.198	Cluster5	0.938041823964993
Q8BZ47	413	S	Zinc finger protein 609 OS=Mus musculus OX=10090 GN=Znf609 PE=1 SV=2	Znf609	0.999998	1.28571e-22	235.57	4	RGS(1)QNSSEHRPPASSTSEDVK	0.2419	1	0.623	1.627	1.449	0.886	0.935	0.48	0.295	2.326	0.513	1.501	1.55	0.77	0.545	0.891	0.542	0.611	0.331	0.948	2.612	1.422	1.74	Cluster5	0.667427699910476
G3XA57	388	S	Rab11 family-interacting protein 2 OS=Mus musculus OX=10090 GN=Rab11fip2 PE=1 SV=1	Rab11fip2	0.997068	1.55827e-05	163.01	3	LNNGGSDSPCDLKS(0.997)PS(0.003)AFSENR	-0.88835	1	0.595	1.587	1.144	0.623	1.373	0.679	0.428	1.923	0.495	2.308	0.833	1.141	0.393	0.721	1.09	0.545	0.594	0.454	2.667	1.047	1.156	Cluster6	0.555485769129753
Q8C341	1069	S	SUN domain-containing ossification factor OS=Mus musculus OX=10090 GN=Suco PE=1 SV=3	Suco	0.855997	0.00167805	93.096	3	RT(0.144)S(0.856)FPLIR	-0.38723	1	1.069	1.136	1.01	0.674	1.322	0.789	0.695	0.945	0.597	1.237	0.764	0.738	0.593	0.889	1.171	0.667	0.781	0.51	1.063	0.63	0.859	Cluster6	0.379334020634272
Q8K2Z4	442	S	Condensin complex subunit 1 OS=Mus musculus OX=10090 GN=Ncapd2 PE=1 SV=2	Ncapd2	1	0.0147426	57.804	3	LS(1)DIDLAGPLQK	-0.19906	1	0.701	1.291	1.136	0.658	1.439	0.774	0.6	1.621	0.538	2.053	0.789	1.104	0.51	0.88	1.176	0.579	0.681	0.457	1.842	0.939	0.897	Cluster6	0.685222017085801
Q8K400	760	S	Syntaxin-binding protein 5 OS=Mus musculus OX=10090 GN=Stxbp5 PE=1 SV=3	Stxbp5	0.961169	2.40275e-06	162.85	4	KLS(0.961)LPT(0.039)DLKPDLDVK	0.90393	1	0.873	1.196	1.054	0.709	1.253	0.915	0.765	1.207	0.73	1.435	0.841	1.048	0.593	0.881	1.291	0.673	0.868	0.566	1.37	0.812	0.955	Cluster6	0.617637960948558
Q8K4J6	41	S	Myocardin-related transcription factor A OS=Mus musculus OX=10090 GN=Mrtfa PE=1 SV=2	Mrtfa	0.994069	0.0067901	61.89	4	EELVS(0.006)QGIMPPLKS(0.994)PAAFHEQR	1.1791	1	0.747	1.337	0.882	0.816	1.355	0.862	0.645	1.181	0.636	1.814	0.651	1.154	0.61	0.66	1.056	0.925	0.977	0.602	1.79	1.092	0.987	Cluster6	0.418469118513005
Q8R149	297	S	BUD13 homolog OS=Mus musculus OX=10090 GN=Bud13 PE=1 SV=1	Bud13	1	6.7741e-05	140.27	5	AHHES(1)PDLELHK	-0.21795	2	0.81	1.011	1.067	0.751	1.422	0.939	0.929	1.317	0.66	1.756	0.75	1.159	0.743	1.055	1.25	0.704	0.88	0.528	1.248	0.927	0.711	Cluster6	0.415508259364036
Q8R1A4	888	S	Dedicator of cytokinesis protein 7 OS=Mus musculus OX=10090 GN=Dock7 PE=1 SV=3	Dock7	0.999421	0.00211885	78.69	3	S(0.001)AVRPAS(0.999)LNLNR	0.66328	1	0.861	1.129	1.218	0.72	1.192	0.88	0.779	1.415	0.738	1.384	1.022	1.022	0.638	1.079	1.222	0.591	0.722	0.604	1.311	0.836	0.947	Cluster6	0.60276547231442
Q8R4Z4	250	S	ETS translocation variant 3 OS=Mus musculus OX=10090 GN=Etv3 PE=1 SV=2	Etv3	1	4.94975e-05	119.34	3	PAMYPDPHS(1)PFAIS(1)PVPGR	-0.1568	2	0.782	1.28	1.229	0.731	1.179	0.799	0.624	1.572	0.678	1.508	1.042	1.022	0.571	0.96	1.093	0.595	0.65	0.62	1.637	0.935	1.086	Cluster6	0.531203029811381
Q91XU0	75	S	ATPase WRNIP1 OS=Mus musculus OX=10090 GN=Wrnip1 PE=1 SV=2	Wrnip1	0.999282	1.20802e-06	144.51	3	RLS(0.999)ES(0.001)SALK	0.582	2	0.839	1.31	1.127	0.745	1.209	0.77	0.588	1.343	0.637	1.441	0.932	0.918	0.569	0.86	1.034	0.661	0.683	0.616	1.561	0.888	1.084	Cluster6	0.665688658202131
Q924A2	1080	S	Protein capicua homolog OS=Mus musculus OX=10090 GN=Cic PE=1 SV=2	Cic	0.788265	0.000118957	114.87	3	RT(0.212)QS(0.788)LSALPK	0.075302	2	0.796	1.146	1.38	0.707	1.145	0.826	0.721	1.734	0.721	1.438	1.205	1.038	0.617	1.204	1.168	0.512	0.599	0.617	1.44	0.888	1.001	Cluster6	0.407301732611231
Q99M51	85	S	Cytoplasmic protein NCK1 OS=Mus musculus OX=10090 GN=Nck1 PE=1 SV=1	Nck1	0.994892	6.2533e-16	224.56	3	KPS(0.995)VPDT(0.005)ASPADDSFVDPGER	-0.83695	2	0.925	1.224	1.108	0.713	1.213	0.817	0.667	1.198	0.674	1.311	0.913	0.883	0.583	0.905	1.146	0.644	0.737	0.588	1.323	0.771	1.009	Cluster6	0.688587476459153
Q99NH2	692	S	Partitioning defective 3 homolog OS=Mus musculus OX=10090 GN=Pard3 PE=1 SV=2	Pard3	1	5.25373e-05	147.18	3	S(1)PGS(1)PAAPELPIETELDDRER	0.31997	3	1.014	0.898	0.949	1.061	1.405	0.673	0.749	0.936	0.479	1.386	0.675	0.664	1.182	1.057	0.634	1.118	0.709	0.755	0.886	1.046	0.639	Cluster6	0.242674727403005
Q9D0L8	100	S	mRNA cap guanine-N7 methyltransferase OS=Mus musculus OX=10090 GN=Rnmt PE=1 SV=1	Rnmt	0.940159	4.09729e-07	179.67	2	GDVS(0.94)EDEPS(0.06)LGR	-0.58812	1	0.831	1.059	1.045	0.72	1.382	0.962	0.908	1.258	0.696	1.663	0.756	1.158	0.68	0.987	1.336	0.689	0.921	0.521	1.274	0.866	0.766	Cluster6	0.434226340306026
Q9D6Z1	513	S	Nucleolar protein 56 OS=Mus musculus OX=10090 GN=Nop56 PE=1 SV=2	Nop56	1	2.31184e-17	220.64	3	EELAS(1)DLEEMATSSAK	-1.1562	2	0.999	1.096	1.292	0.732	1.101	0.779	0.711	1.293	0.708	1.102	1.173	0.78	0.668	1.179	1.064	0.567	0.603	0.665	1.097	0.733	0.995	Cluster6	0.381916796113395
Q9EQM6	8	S	Microprocessor complex subunit DGCR8 OS=Mus musculus OX=10090 GN=Dgcr8 PE=1 SV=2	Dgcr8	0.959867	1.06949e-10	150.49	2	METYES(0.04)PS(0.96)PLPR	-0.54443	1	0.904	0.996	1.04	0.69	1.375	0.996	1	1.15	0.724	1.521	0.756	1.102	0.693	1.044	1.443	0.663	0.958	0.502	1.102	0.763	0.724	Cluster6	0.315171042728083
Q9ERU9	954	S	E3 SUMO-protein ligase RanBP2 OS=Mus musculus OX=10090 GN=Ranbp2 PE=1 SV=2	Ranbp2	0.999983	0.000154777	117.31	3	FESPATGILS(1)PR	0.15385	1	0.859	1.247	1.187	0.609	1.111	0.987	0.791	1.382	0.888	1.293	1.068	1.149	0.488	0.952	1.621	0.513	0.832	0.548	1.452	0.709	1.122	Cluster6	0.402705762400529
Q9ESD6	2	S	CKLF-like MARVEL transmembrane domain-containing protein 7 OS=Mus musculus OX=10090 GN=Cmtm7 PE=1 SV=1	Cmtm7	0.998058	0.0456058	40.098	2	S(0.998)HGS(0.002)GLVR	1.4237	1	0.797	1.123	1.246	0.55	1.129	1.155	1.028	1.563	1.023	1.417	1.104	1.449	0.49	1.11	2.1	0.441	0.927	0.487	1.409	0.69	0.995	Cluster6	0.26630413238841
Q9ESK9	243	S	RB1-inducible coiled-coil protein 1 OS=Mus musculus OX=10090 GN=Rb1cc1 PE=1 SV=3	Rb1cc1	1	7.51932e-07	168.93	2	S(0.997)T(0.003)ELVLS(1)PDMPR	0.34989	3	0.995	1.022	1.03	0.906	1.355	0.692	0.677	1.035	0.511	1.362	0.76	0.695	0.886	1.008	0.764	0.88	0.672	0.669	1.027	0.911	0.754	Cluster6	0.338186542989236
Q9QXL2	855	S	Kinesin-like protein KIF21A OS=Mus musculus OX=10090 GN=Kif21a PE=1 SV=2	Kif21a	0.963805	1.2455e-40	281.22	3	KLS(0.964)S(0.012)S(0.024)ESPAPDTGSSAASGEADTSR	1.1419	2	0.736	1.363	1.235	0.69	1.258	0.718	0.527	1.678	0.571	1.709	0.982	0.976	0.506	0.906	1.041	0.559	0.581	0.548	1.852	0.937	1.083	Cluster6	0.572257049153542
Q9R078	108	S	5'-AMP-activated protein kinase subunit beta-1 OS=Mus musculus OX=10090 GN=Prkab1 PE=1 SV=2	Prkab1	1	3.70575e-23	234.55	3	S(1)QNNFVAILDLPEGEHQYK	-0.015643	5	0.794	1.136	1.161	0.799	1.265	0.844	0.743	1.462	0.667	1.593	0.918	1.063	0.703	1.022	1.056	0.688	0.727	0.632	1.431	1.006	0.898	Cluster6	0.590886815833602
Q9R210	331	S	Transcription factor EB OS=Mus musculus OX=10090 GN=Tfeb PE=1 SV=2	Tfeb	0.897776	3.36061e-30	254.11	4	VHGLPT(0.01)T(0.091)S(0.898)PS(0.002)GVNMAELAQQVVK	0.31726	1	0.789	1.046	1.1	0.825	1.37	0.87	0.832	1.394	0.635	1.736	0.803	1.103	0.789	1.052	1.055	0.75	0.791	0.602	1.326	1.046	0.764	Cluster6	0.473921111021137
Q9WUK4	19	S	Replication factor C subunit 2 OS=Mus musculus OX=10090 GN=Rfc2 PE=1 SV=1	Rfc2	0.970121	0.00232328	51.871	3	MEVQESGCDPS(0.002)ES(0.002)GAQEPS(0.97)PVPS(0.025)K	0.18946	1	0.777	0.866	1.211	0.876	1.423	0.846	0.977	1.559	0.595	1.831	0.851	1.089	1.012	1.398	0.966	0.723	0.699	0.616	1.115	1.127	0.609	Cluster6	0.314224274350225
O55098	416	S	Serine/threonine-protein kinase 10 OS=Mus musculus OX=10090 GN=Stk10 PE=1 SV=2	Stk10	0.903231	0.00116419	91.62	3	S(0.097)RPLS(0.903)MDAR	-0.7138	1	0.861	1.041	0.959	0.711	1.454	0.974	0.936	1.114	0.67	1.689	0.66	1.131	0.683	0.921	1.37	0.741	1.016	0.489	1.209	0.826	0.716	Cluster6	0.344638664335009
O88842	732	T	FYVE, RhoGEF and PH domain-containing protein 3 OS=Mus musculus OX=10090 GN=Fgd3 PE=1 SV=1	Fgd3	0.955803	2.18209e-08	151.37	4	ALGTAVHGDTAGDRPGASQPQAPAGT(0.044)DT(0.956)P	-0.37057	1	1.153	1.101	1.074	0.791	1.164	0.717	0.651	0.931	0.616	1.01	0.923	0.622	0.718	0.975	0.906	0.736	0.668	0.68	0.955	0.686	0.946	Cluster6	0.306412499261262
Q8R0S1	326	T	Cyclic AMP-dependent transcription factor ATF-7 OS=Mus musculus OX=10090 GN=Atf7 PE=1 SV=1	Atf7	1	0.000146503	126.77	3	RRT(1)VDEDPDER	-1.0243	1	0.559	2.082	0.865	0.332	1.641	0.522	0.251	1.547	0.318	2.936	0.527	0.934	0.159	0.415	1.572	0.384	0.603	0.202	3.725	0.594	1.269	Cluster6	0.60546335436061
Q8R0S1	53	T	Cyclic AMP-dependent transcription factor ATF-7 OS=Mus musculus OX=10090 GN=Atf7 PE=1 SV=1	Atf7	0.833653	1.93915e-07	172.37	3	TDSVIIADQT(0.075)PT(0.834)PT(0.091)R	-1.3077	1	0.812	1.215	1.222	0.717	1.034	0.999	0.822	1.505	0.966	1.273	1.182	1.23	0.59	1.006	1.393	0.587	0.818	0.693	1.496	0.883	1.175	Cluster6	0.358500151707606
P63085	185	Y	Mitogen-activated protein kinase 1 OS=Mus musculus OX=10090 GN=Mapk1 PE=1 SV=3	Mapk1	0.999393	1.88566e-16	224.86	4	VADPDHDHTGFLTEY(0.999)VAT(0.001)R	-0.39676	3	0.649	1.493	0.923	0.641	1.61	0.685	0.459	1.422	0.425	2.481	0.573	1.055	0.429	0.618	1.069	0.694	0.742	0.398	2.3	0.988	0.927	Cluster6	0.551457516213585
Q63844	205	Y	Mitogen-activated protein kinase 3 OS=Mus musculus OX=10090 GN=Mapk3 PE=1 SV=5	Mapk3	0.999268	6.04482e-06	159.19	4	IADPEHDHTGFLTEY(0.999)VAT(0.001)R	-0.63431	1	0.696	1.583	1.025	0.405	1.525	0.766	0.484	1.473	0.502	2.191	0.672	1.101	0.256	0.648	1.891	0.395	0.747	0.266	2.274	0.582	1.038	Cluster6	0.58936322043818
P33174	811	S	Chromosome-associated kinesin KIF4 OS=Mus musculus OX=10090 GN=Kif4 PE=1 SV=3	Kif4	1	2.91295e-05	151.02	3	TFSYDEIHGQDS(1)GAEDS(1)IAK	-0.40862	2	0.799	0.924	1.258	0.874	1.314	0.832	0.9	1.574	0.633	1.645	0.957	1.041	0.946	1.361	0.952	0.695	0.661	0.665	1.156	1.094	0.703	Cluster6	0.341374724847438
P33611	126	S	DNA polymerase alpha subunit B OS=Mus musculus OX=10090 GN=Pola2 PE=1 SV=2	Pola2	0.870581	6.0495e-11	188.15	2	VS(0.006)S(0.871)T(0.124)PETPLTK	1.7606	2	0.831	1.143	1.13	0.778	1.279	0.839	0.734	1.36	0.656	1.539	0.884	1.01	0.681	0.989	1.078	0.688	0.742	0.608	1.375	0.936	0.894	Cluster6	0.685964748310655
A6H8H2	1383	S	DENN domain-containing protein 4C OS=Mus musculus OX=10090 GN=Dennd4c PE=1 SV=1	Dennd4c	0.99954	1.43135e-05	160.77	3	MWVAVASAYSYS(1)DDEEETNK	-0.9267	1	1.129	1.143	1.122	0.69	1.12	0.795	0.696	0.994	0.71	0.992	1.002	0.704	0.604	0.982	1.152	0.615	0.709	0.616	1.012	0.611	1.021	Cluster6	0.318550706333233
Q05D44	215	S	Eukaryotic translation initiation factor 5B OS=Mus musculus OX=10090 GN=Eif5b PE=1 SV=2	Eif5b	1	6.37083e-103	362.93	3	SVPTVDS(1)GNEDDDSSFK	2.9242	9	1.026	1.187	1.171	0.723	1.161	0.732	0.617	1.141	0.63	1.132	1.009	0.713	0.609	0.987	1.012	0.617	0.625	0.623	1.157	0.705	1.022	Cluster6	0.453377217527742
Q0KL02	2481	S	Triple functional domain protein OS=Mus musculus OX=10090 GN=Trio PE=1 SV=3	Trio	0.961337	3.87782e-05	152.38	2	EAFPPS(0.039)S(0.961)PLQK	0.83403	14	0.839	1.256	1.135	0.752	1.184	0.834	0.664	1.353	0.704	1.411	0.959	0.994	0.599	0.904	1.109	0.663	0.735	0.635	1.497	0.896	1.061	Cluster6	0.719849009756834
Q14BA6	274	S	Mesenteric estrogen-dependent adipogenesis protein OS=Mus musculus OX=10090 GN=Medag PE=2 SV=2	Medag	1	7.90426e-05	103.66	3	GSIDDVFNCNLS(1)PR	0.42882	1	0.885	1.079	1.21	0.656	1.276	0.893	0.828	1.367	0.7	1.442	0.948	1.009	0.608	1.121	1.361	0.542	0.738	0.514	1.219	0.741	0.846	Cluster6	0.507292326127384
Q3U214	61	S	Microtubule-associated serine/threonine-protein kinase 3 OS=Mus musculus OX=10090 GN=Mast3 PE=1 SV=3	Mast3	0.978351	0.000362061	95.236	3	SLVVGT(1)PS(0.978)PT(0.022)LSR	-0.52451	2	0.881	1.323	0.992	0.727	1.223	0.854	0.646	1.126	0.698	1.388	0.811	0.969	0.55	0.75	1.175	0.733	0.861	0.594	1.502	0.825	1.082	Cluster6	0.58752096694998
Q3UHK3	1131	S	Protein GREB1 OS=Mus musculus OX=10090 GN=Greb1 PE=2 SV=2	Greb1	0.966374	7.49173e-05	107.03	3	S(0.034)HS(0.966)HDSASSSLSSR	-0.12228	2	0.797	1.196	1.295	0.698	0.965	1.05	0.878	1.625	1.088	1.211	1.342	1.317	0.584	1.083	1.504	0.539	0.811	0.723	1.501	0.876	1.239	Cluster6	0.276997853648265
Q3UXZ9	223	S	Lysine-specific demethylase 5A OS=Mus musculus OX=10090 GN=Kdm5a PE=1 SV=2	Kdm5a	0.972317	0.00690694	64.565	3	VKS(0.972)QS(0.02)DS(0.008)GEVNR	-1.3892	1	0.703	1.699	1.093	0.662	1.115	0.728	0.428	1.555	0.653	1.586	0.98	1.036	0.39	0.643	1.1	0.606	0.666	0.594	2.417	0.942	1.524	Cluster6	0.420236917827018
Q5XJE5	94	S	RNA polymerase-associated protein LEO1 OS=Mus musculus OX=10090 GN=Leo1 PE=1 SV=2	Leo1	0.864663	4.89392e-54	310.45	4	S(0.019)EAS(0.116)ERS(0.865)DHEDNEPS(0.008)DEDQHS(0.997)GS(0.995)EAHNDDDDEGHR	-0.52843	7	0.873	1.291	1.241	0.494	1.153	0.948	0.734	1.422	0.822	1.321	1.076	1.086	0.383	0.961	1.919	0.398	0.764	0.428	1.479	0.566	1.12	Cluster6	0.380211605014398
Q6DID5	226	S	PWWP domain-containing DNA repair factor 3A OS=Mus musculus OX=10090 GN=Pwwp3a PE=1 SV=1	Pwwp3a	0.99996	0.000302415	107.09	3	RRS(1)ESGLSK	0.6775	1	0.853	1.41	1.074	0.72	1.104	0.839	0.595	1.259	0.76	1.294	0.973	0.984	0.511	0.762	1.165	0.67	0.781	0.652	1.653	0.844	1.277	Cluster6	0.516156071551607
Q6NZF1	289	S	Zinc finger CCCH domain-containing protein 11A OS=Mus musculus OX=10090 GN=Zc3h11a PE=1 SV=1	Zc3h11a	0.984977	0.000239725	96.773	3	KLS(0.985)VGGDS(0.015)DPPLKR	0.29684	4	0.798	1.588	1.071	0.718	1.119	0.706	0.445	1.342	0.631	1.402	0.957	0.885	0.452	0.674	0.983	0.67	0.659	0.642	1.99	0.9	1.419	Cluster6	0.426271913737056
Q6NZF1	740	S	Zinc finger CCCH domain-containing protein 11A OS=Mus musculus OX=10090 GN=Zc3h11a PE=1 SV=1	Zc3h11a	0.989768	1.229e-42	282.62	4	RLS(0.99)S(0.01)ASTGKPPLSVEDDFEK	0.0017511	3	0.684	1.535	1.278	0.621	1.268	0.615	0.401	1.868	0.485	1.854	1.008	0.899	0.405	0.833	0.99	0.486	0.481	0.49	2.244	0.908	1.211	Cluster6	0.48442696359086
Q6NZJ6	1211	S	Eukaryotic translation initiation factor 4 gamma 1 OS=Mus musculus OX=10090 GN=Eif4g1 PE=1 SV=1	Eif4g1	0.998533	0.000423738	102.66	2	KAAS(0.999)LT(0.001)EDR	1.0812	3	0.881	1.058	1.01	0.704	1.418	0.93	0.879	1.146	0.656	1.61	0.712	1.056	0.665	0.955	1.321	0.697	0.921	0.496	1.201	0.799	0.746	Cluster6	0.413760545942675
Q6P3Y5	570	S	Zinc finger protein 280C OS=Mus musculus OX=10090 GN=Znf280c PE=1 SV=1	Znf280c	0.891294	8.31609e-05	97.902	2	ATT(0.001)T(0.105)S(0.891)PQT(0.003)VATTTGK	-1.5363	2	1.099	1.014	1.175	0.846	1.17	0.696	0.686	1.069	0.595	1.065	1.004	0.633	0.834	1.159	0.823	0.72	0.592	0.723	0.923	0.77	0.867	Cluster6	0.302075451722831
Q6P9Q4	514	S	FH1/FH2 domain-containing protein 1 OS=Mus musculus OX=10090 GN=Fhod1 PE=1 SV=3	Fhod1	1	0.00418423	84.615	3	S(1)LEPEPK	-0.22702	1	0.817	1.47	1.081	0.727	1.129	0.775	0.527	1.323	0.686	1.382	0.957	0.949	0.495	0.735	1.066	0.673	0.717	0.644	1.799	0.89	1.302	Cluster6	0.494121858120004
Q6PAL8	193	S	DENN domain-containing protein 5A OS=Mus musculus OX=10090 GN=Dennd5a PE=1 SV=1	Dennd5a	0.999965	0.000992245	115	2	FNS(1)YDISR	1.1513	1	0.734	1.331	1.056	0.839	1.234	0.806	0.606	1.439	0.653	1.681	0.856	1.098	0.63	0.793	0.961	0.795	0.763	0.68	1.813	1.143	1.079	Cluster6	0.448226819667462
Q6PCQ0	509	S	IQ domain-containing protein E OS=Mus musculus OX=10090 GN=Iqce PE=1 SV=1	Iqce	0.816024	3.24565e-06	156.71	3	HS(0.028)EPDS(0.816)DNS(0.156)AGEEGSSQPPAPCSEER	0.017525	1	1.026	1.436	0.969	0.685	1.122	0.763	0.531	0.944	0.68	1.094	0.864	0.744	0.477	0.675	1.114	0.707	0.787	0.611	1.4	0.668	1.28	Cluster6	0.386217627323067
Q6ZPR6	1197	S	Inhibitor of Bruton tyrosine kinase OS=Mus musculus OX=10090 GN=Ibtk PE=1 SV=3	Ibtk	0.992374	0.000369878	94.281	3	PANAWAPLHS(0.992)PLS(0.008)R	-0.042056	1	1.044	1.374	1.035	0.668	1.054	0.826	0.601	0.991	0.784	1.01	0.982	0.791	0.486	0.753	1.237	0.645	0.798	0.634	1.316	0.64	1.304	Cluster6	0.351688988790953
Q6ZPY7	599	S	Lysine-specific demethylase 3B OS=Mus musculus OX=10090 GN=Kdm3b PE=1 SV=2	Kdm3b	1	0.00154205	110.53	3	RFS(1)LDER	-0.71829	1	0.809	1.677	0.94	0.656	1.228	0.69	0.411	1.162	0.562	1.518	0.765	0.853	0.391	0.561	1.052	0.698	0.734	0.534	2.073	0.811	1.366	Cluster6	0.479040824040938
Q6ZPZ3	131	S	Zinc finger CCCH domain-containing protein 4 OS=Mus musculus OX=10090 GN=Zc3h4 PE=1 SV=2	Zc3h4	0.879227	7.48556e-54	309.59	3	HAS(0.879)S(0.119)S(0.002)DDFSDFSDDSDFSPSEK	1.0395	2	0.648	1.053	1.029	0.79	1.384	1.097	1.042	1.588	0.793	2.136	0.743	1.693	0.75	0.977	1.389	0.768	1.066	0.571	1.625	1.219	0.761	Cluster6	0.296556205499479
Q6ZQ12	584	S	Ninein-like protein OS=Mus musculus OX=10090 GN=Ninl PE=1 SV=3	Ninl	0.887412	0.000116935	109.54	3	S(0.113)RQS(0.887)PAGTPGTHR	0.79767	1	0.724	0.978	1.15	0.816	1.341	0.991	1.013	1.588	0.739	1.852	0.858	1.369	0.834	1.176	1.214	0.71	0.862	0.609	1.351	1.127	0.729	Cluster6	0.341084121624291
Q80U35	486	S	Rho guanine nucleotide exchange factor 17 OS=Mus musculus OX=10090 GN=Arhgef17 PE=1 SV=2	Arhgef17	1	0.0223284	54.103	4	KPS(1)GGPGNRPLDGR	-0.31882	1	0.927	1.158	1.074	0.948	1.224	0.669	0.578	1.159	0.547	1.32	0.877	0.722	0.819	0.927	0.706	0.883	0.623	0.775	1.249	1.023	0.946	Cluster6	0.344995246818242
Q80WQ6	298	S	Inactive rhomboid protein 2 OS=Mus musculus OX=10090 GN=Rhbdf2 PE=1 SV=1	Rhbdf2	0.999965	1.95919e-16	220.28	4	GVPHS(0.015)AS(0.985)PVS(1)PDGVHIPLK	-0.52734	2	0.785	1.251	1.056	0.714	1.364	0.83	0.663	1.345	0.609	1.738	0.774	1.057	0.571	0.844	1.162	0.676	0.786	0.523	1.594	0.91	0.917	Cluster6	0.676434699050426
Q8BKU8	497	S	Transmembrane protein 87B OS=Mus musculus OX=10090 GN=Tmem87b PE=2 SV=1	Tmem87b	0.973128	7.07967e-43	282.79	3	T(0.015)VS(0.973)NGT(0.012)AKPTSDNFDEDLK	-0.21012	2	0.733	1.154	1.12	0.789	1.433	0.772	0.669	1.528	0.539	1.955	0.782	1.053	0.684	0.971	0.978	0.704	0.689	0.551	1.574	1.076	0.805	Cluster6	0.53481591624782
Q8BRB7	1136	S	Histone acetyltransferase KAT6B OS=Mus musculus OX=10090 GN=Kat6b PE=1 SV=3	Kat6b	0.999995	0.00123825	80.83	4	REETGIPVS(1)PHK	-0.2927	2	1.044	1.143	1.159	0.62	1.36	0.675	0.591	1.11	0.496	1.303	0.852	0.647	0.542	1.014	1.089	0.535	0.582	0.456	1.095	0.594	0.84	Cluster6	0.447996053120735
Q8BSI6	167	S	R3H and coiled-coil domain-containing protein 1 OS=Mus musculus OX=10090 GN=R3hcc1 PE=1 SV=3	R3hcc1	1	5.63894e-05	122.14	3	GEDPAGAVS(1)EEEPR	0.0066738	1	0.913	1.319	1.174	0.617	1.241	0.735	0.557	1.286	0.592	1.359	0.946	0.805	0.468	0.89	1.191	0.526	0.626	0.497	1.445	0.676	1.063	Cluster6	0.634889113592763
Q8BTI8	1229	S	Serine/arginine repetitive matrix protein 2 OS=Mus musculus OX=10090 GN=Srrm2 PE=1 SV=3	Srrm2	1	2.50596e-66	318.67	3	EMPGSNIES(1)S(1)PEVEERPAVLSALDQSQSQPSK	0.17594	5	1.056	1.142	0.947	0.851	1.292	0.713	0.624	0.897	0.552	1.223	0.733	0.675	0.745	0.829	0.838	0.899	0.753	0.659	1.081	0.806	0.884	Cluster6	0.34398941820542
Q8BTI8	1798	S	Serine/arginine repetitive matrix protein 2 OS=Mus musculus OX=10090 GN=Srrm2 PE=1 SV=3	Srrm2	0.984778	0.00823508	73.36	3	S(0.985)RT(0.015)PLTSR	0.87456	2	1.028	1.19	1.132	0.639	1.192	0.82	0.689	1.101	0.688	1.16	0.95	0.798	0.537	0.951	1.283	0.564	0.724	0.536	1.158	0.622	0.998	Cluster6	0.441038394233685
Q8BWW9	619	S	Serine/threonine-protein kinase N2 OS=Mus musculus OX=10090 GN=Pkn2 PE=1 SV=3	Pkn2	0.991162	2.75624e-07	173.56	3	S(0.991)KS(0.009)EYELSIPDSGR	-0.46434	2	0.787	1.174	1.012	0.788	1.385	0.854	0.727	1.286	0.617	1.76	0.731	1.085	0.671	0.862	1.084	0.779	0.844	0.569	1.492	1.001	0.848	Cluster6	0.55001060104549
